# Supplementary material for: Genetic association and causal inference between lung function and venous thromboembolism
Source: PubMed Central journal article supplement (PMC9885683; doi:10.1186/s12931-023-02335-3), 2023-01-30
Supplement: 12931_2023_2335_MOESM4_ESM.pdf [file 12931_2023_2335_MOESM4_ESM.pdf]

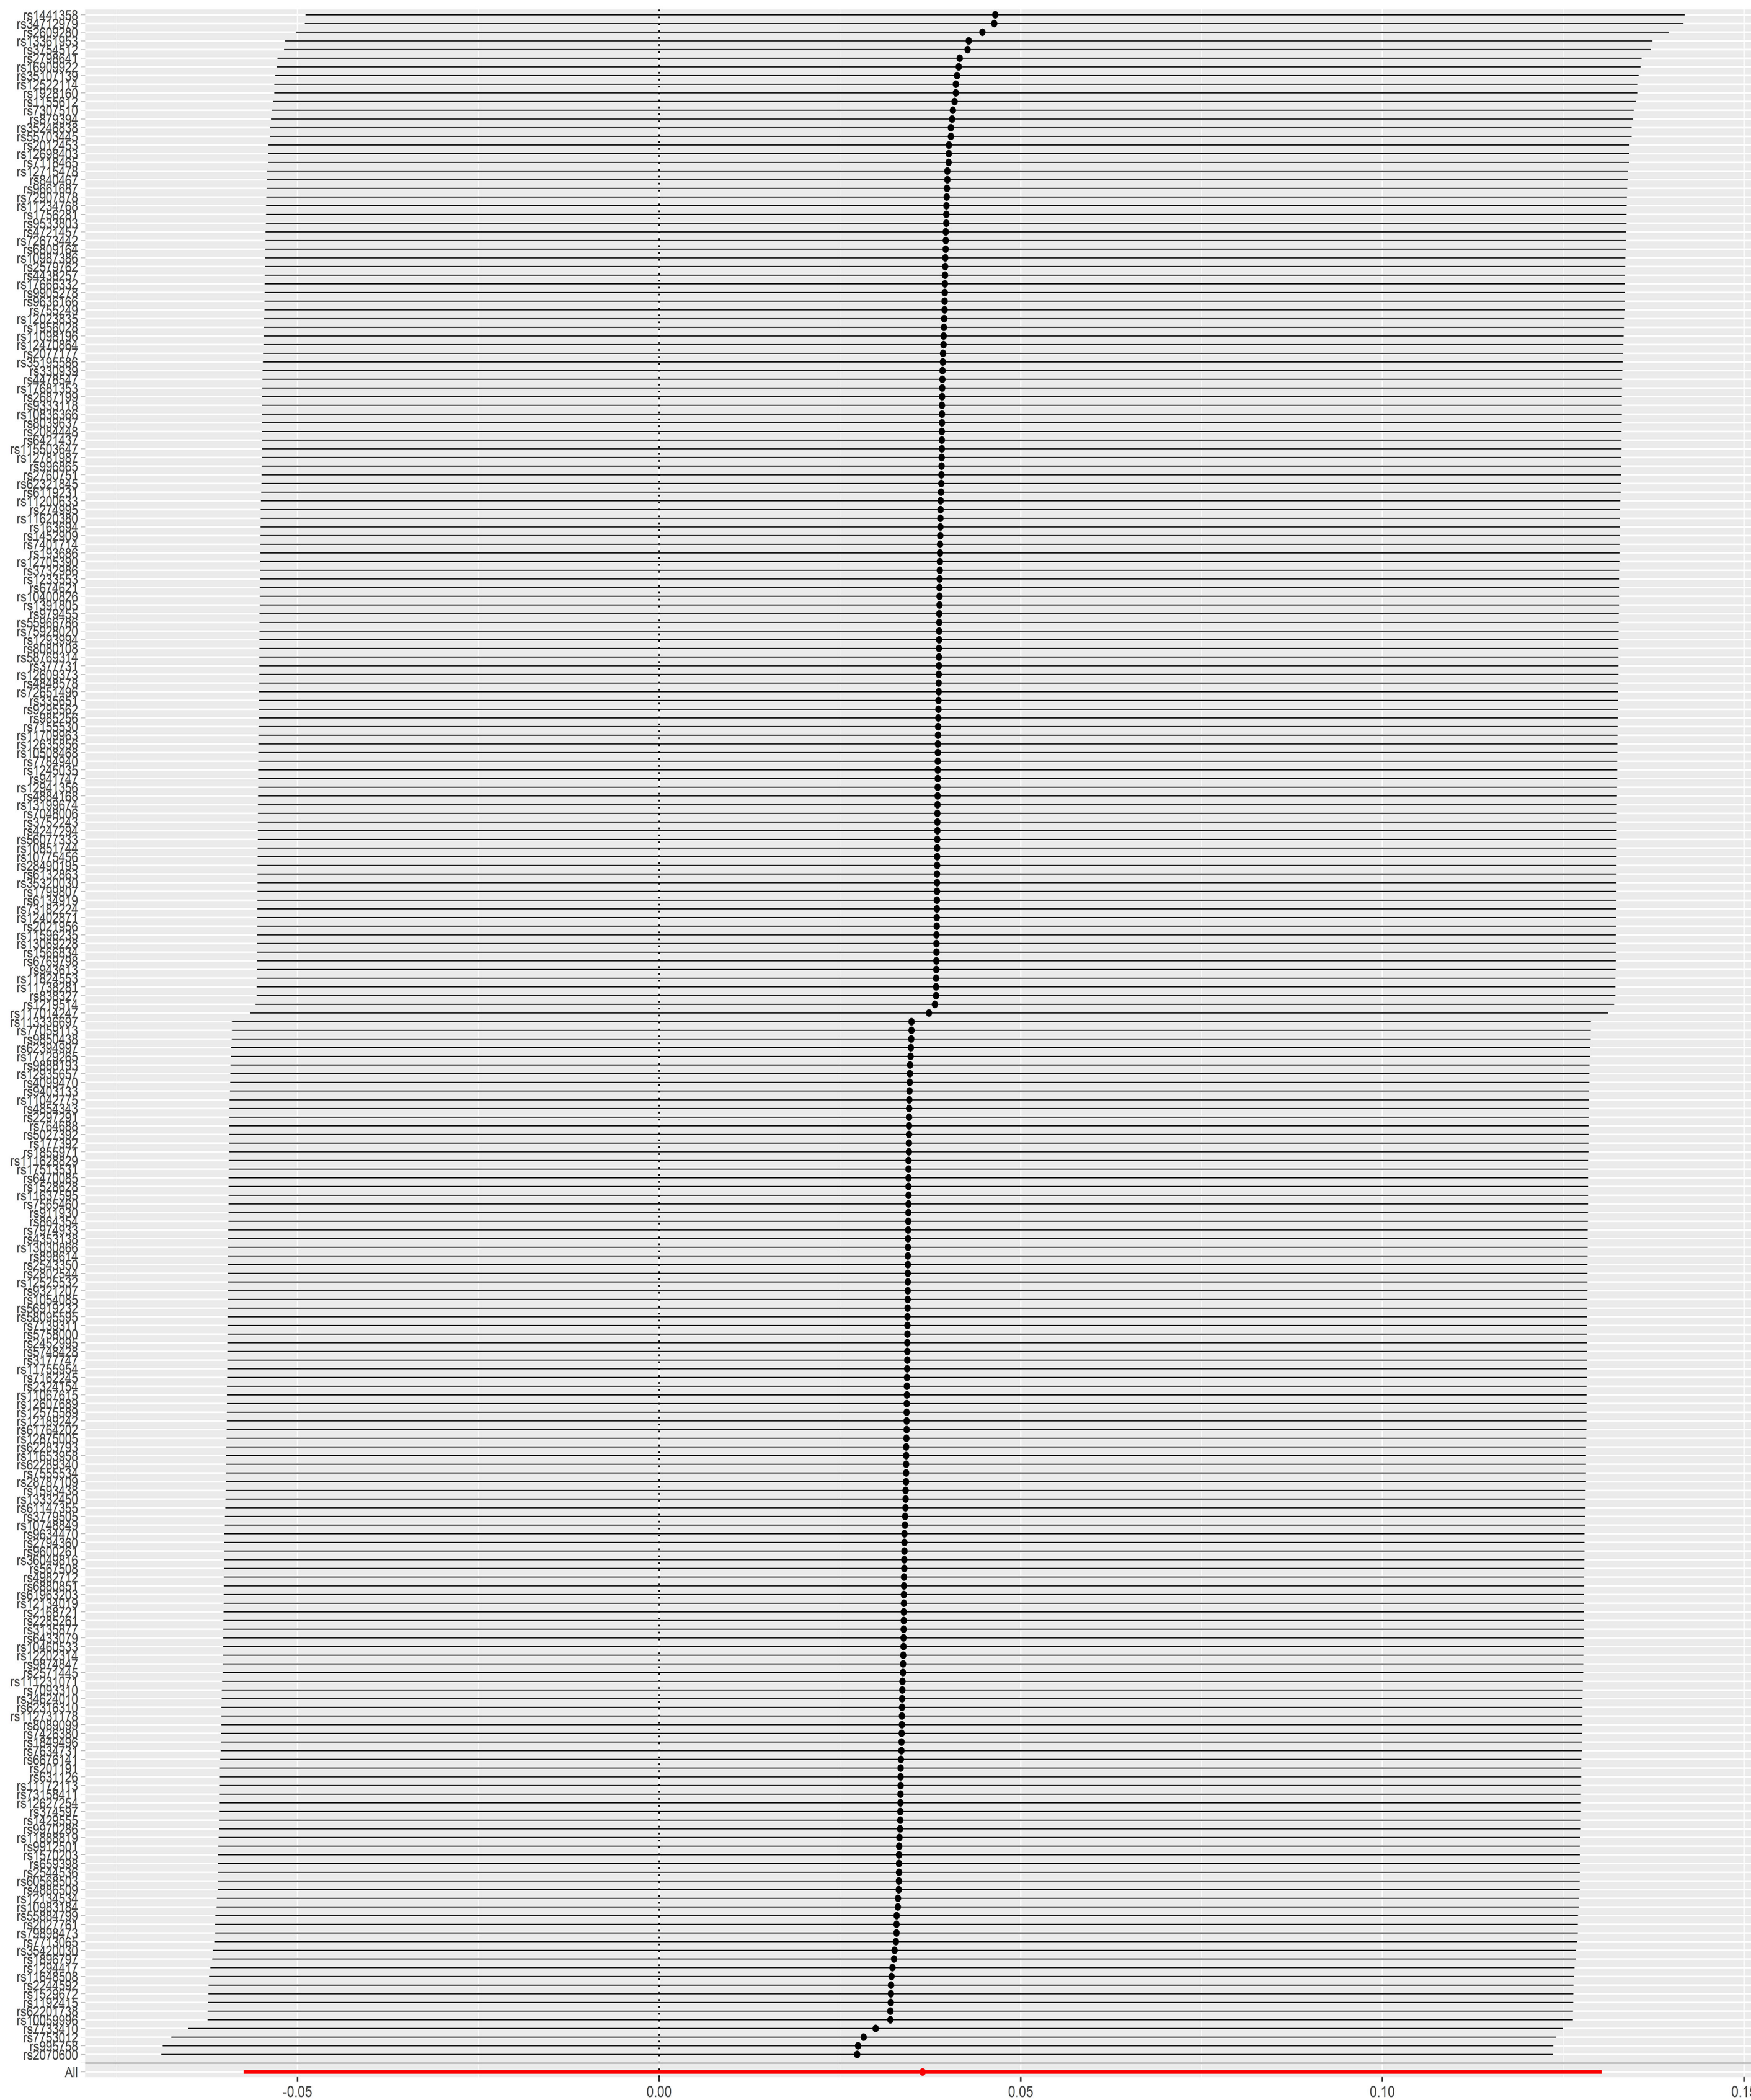

Figure S12. A. MR leave-one-out sensitivity analysis for FEV1/FVC on VTE

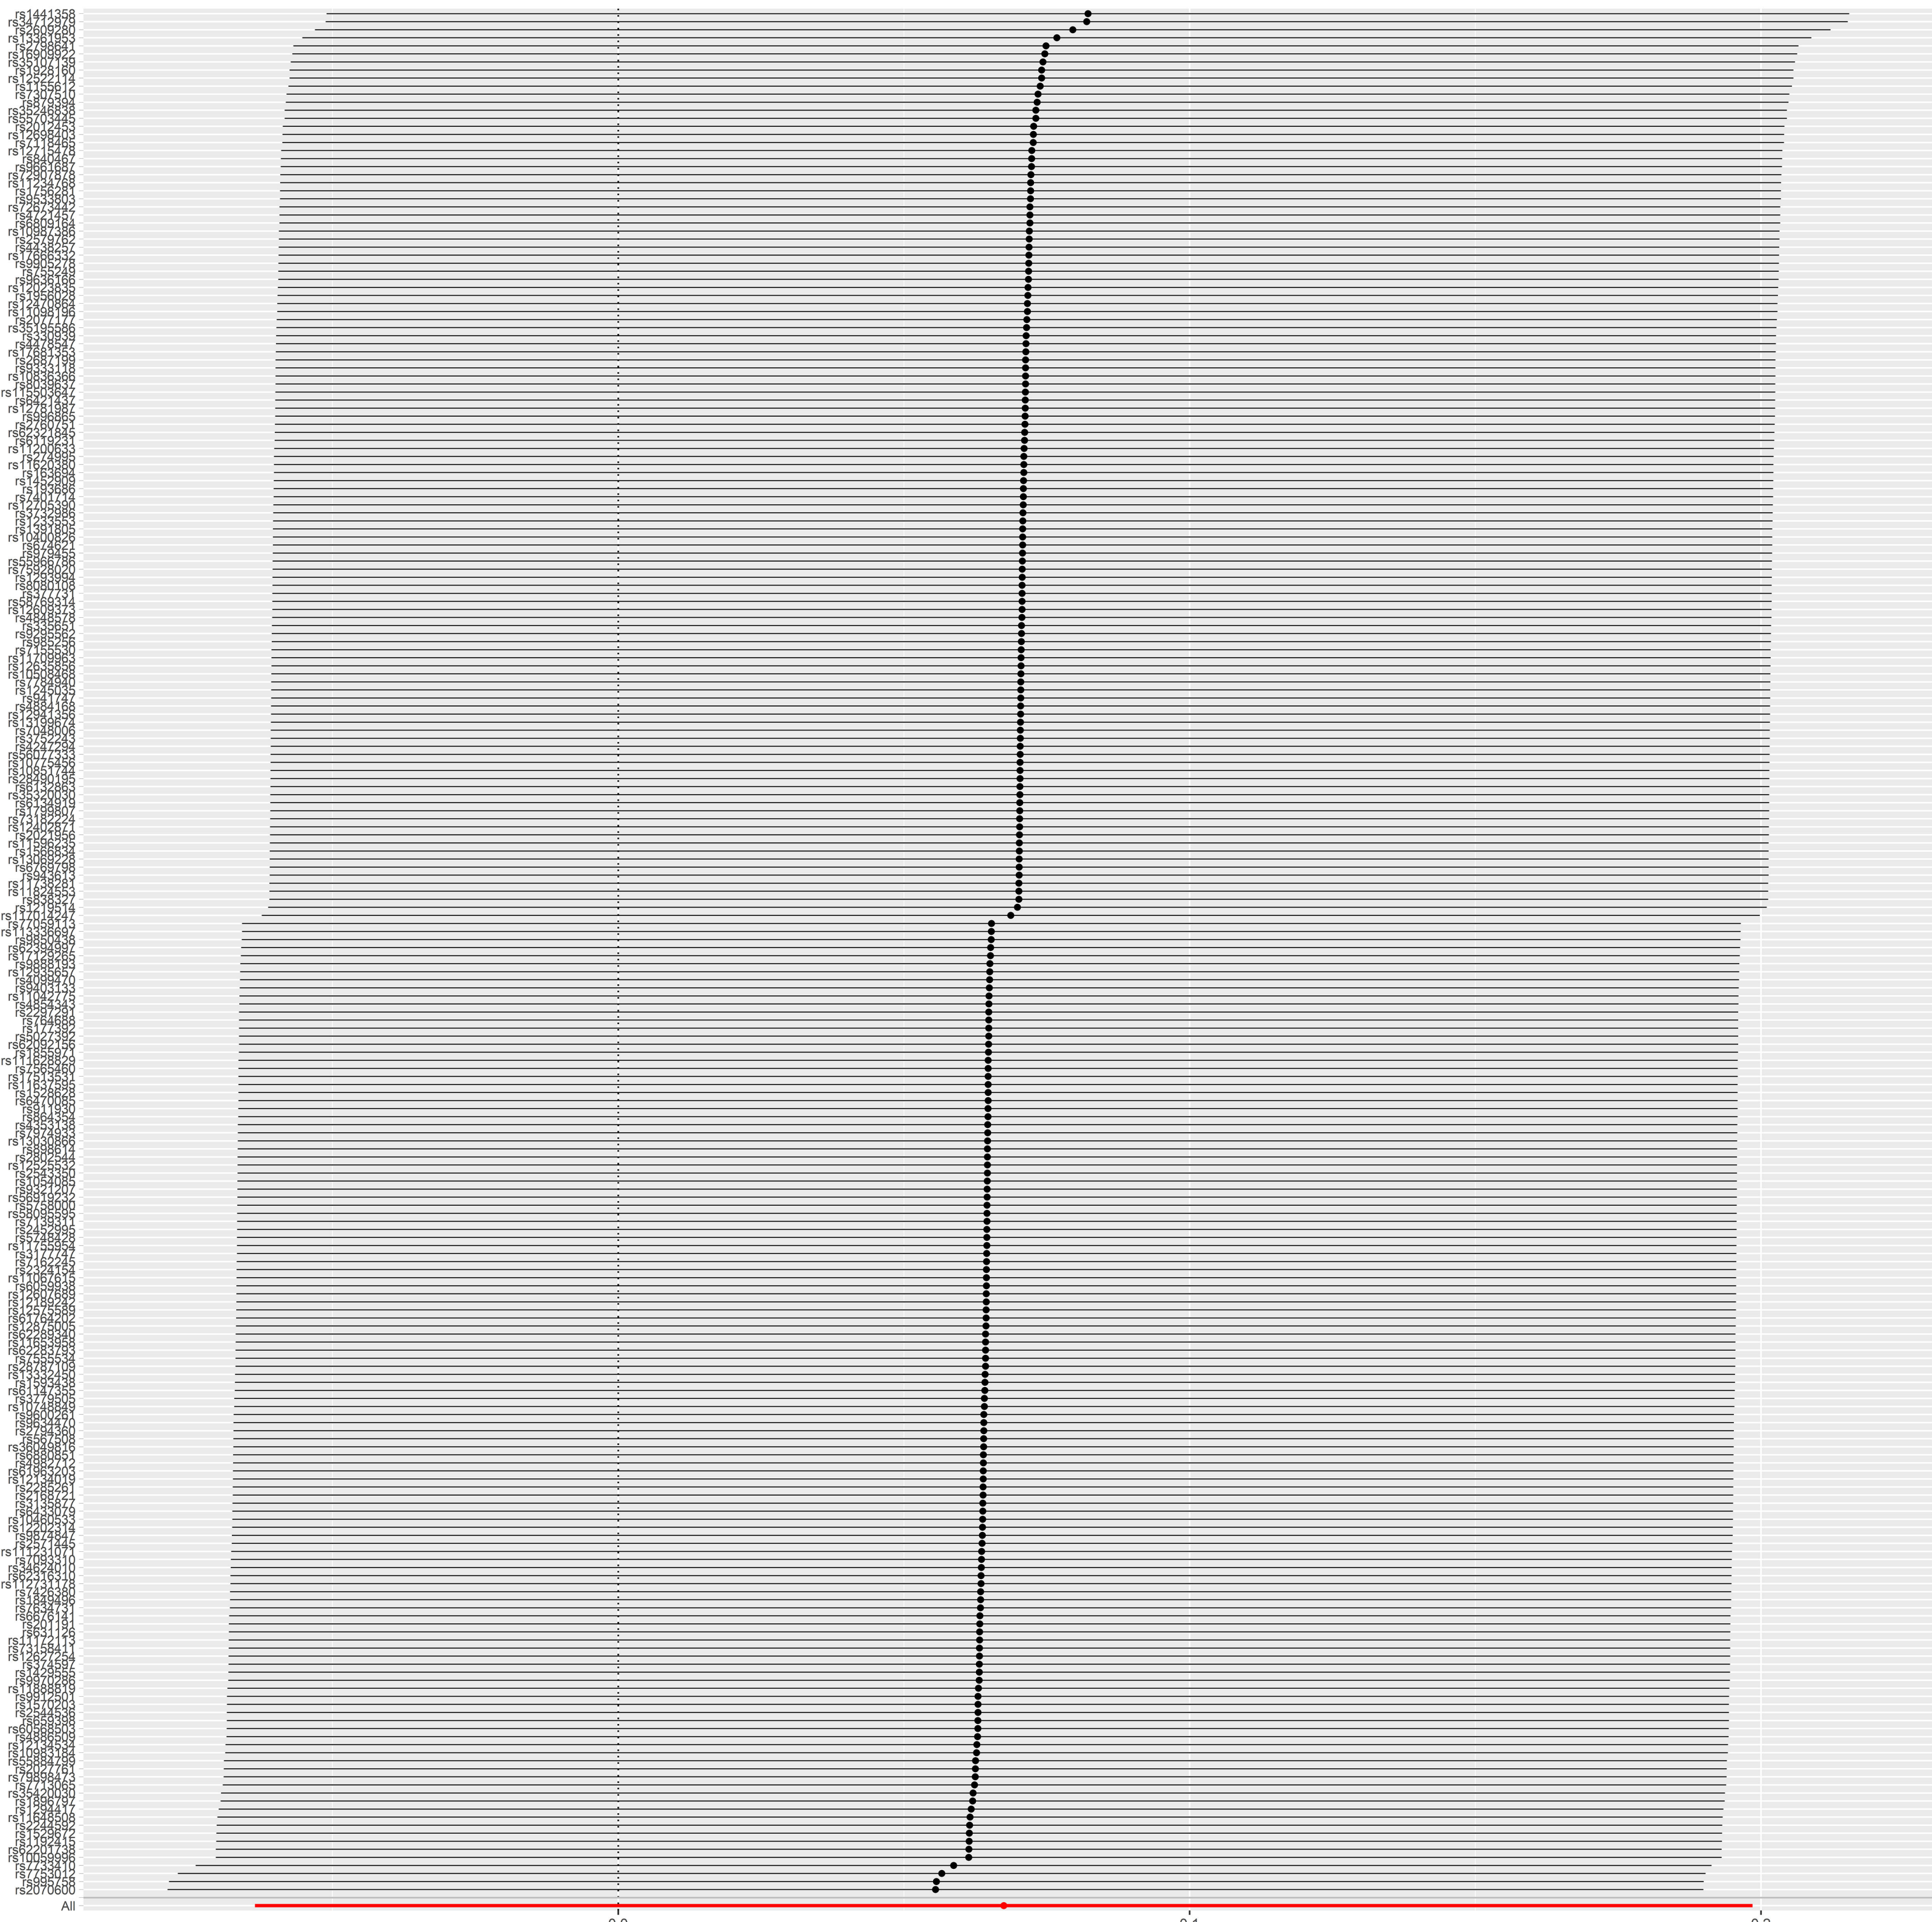

Figure S12. B. MR leave-one-out sensitivity analysis for FEV1/FVC on DVT

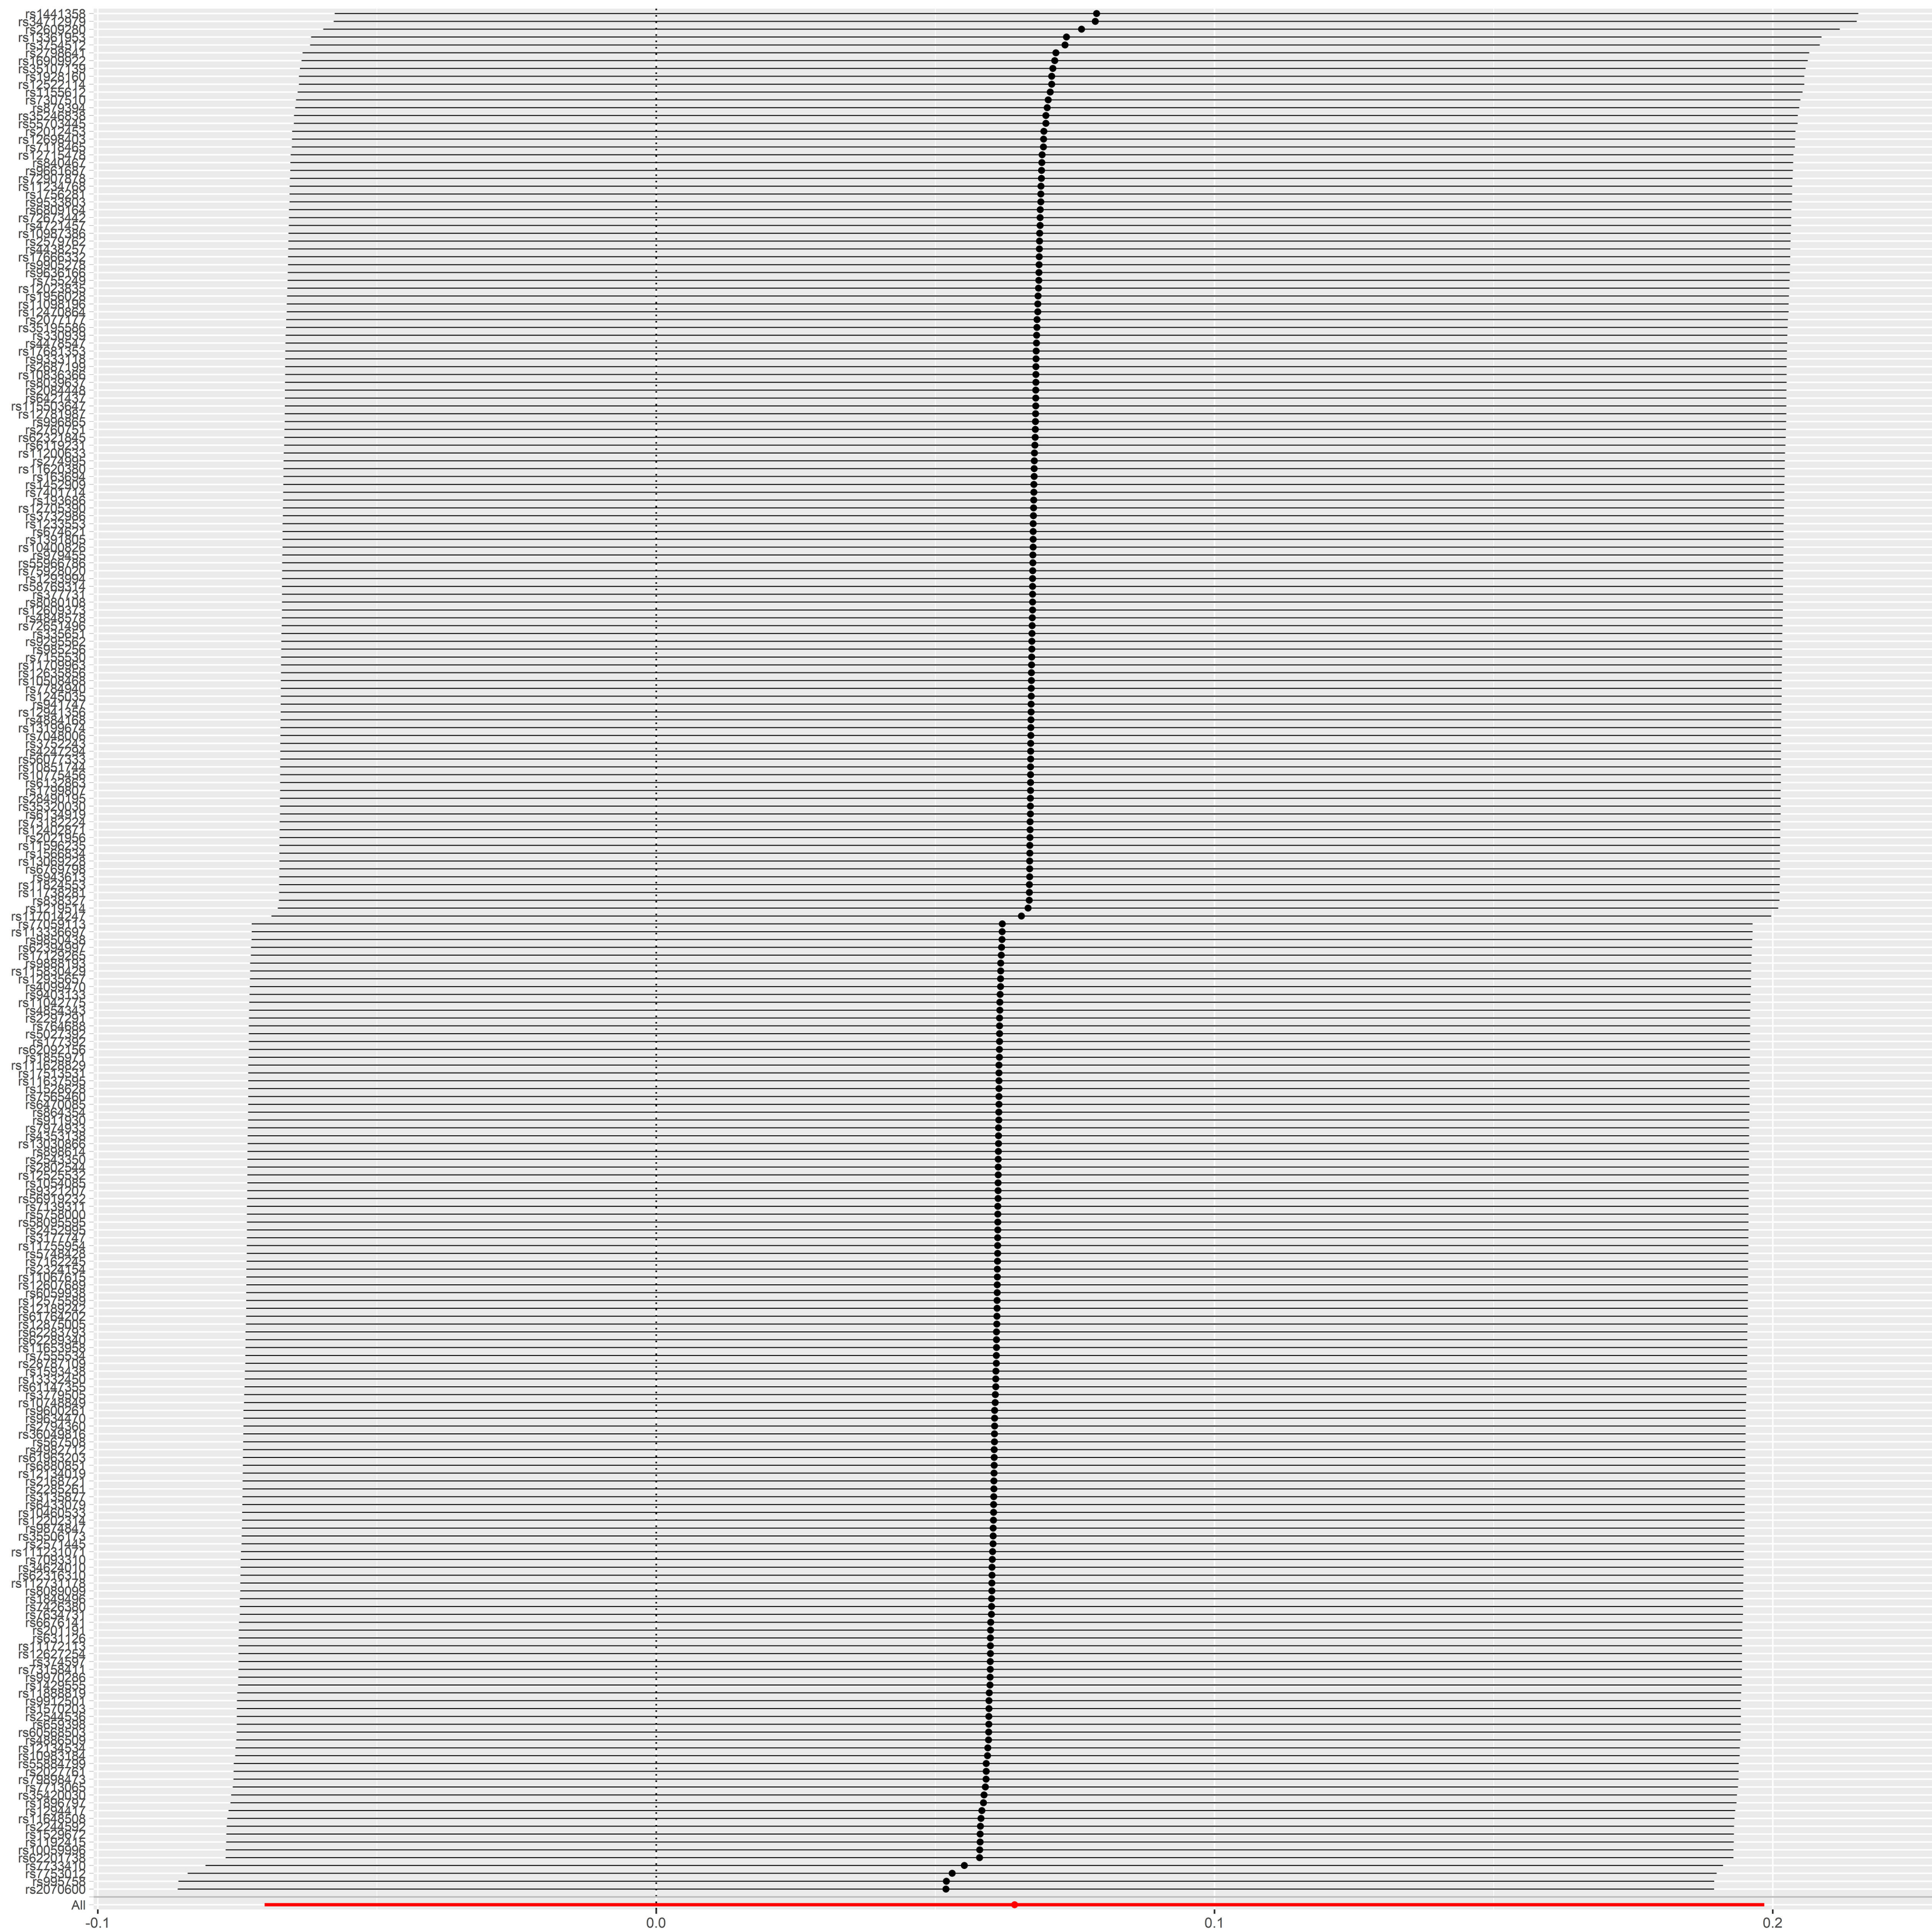

Figure S12. C. MR leave-one-out sensitivity analysis for FEV1/FVC on PE

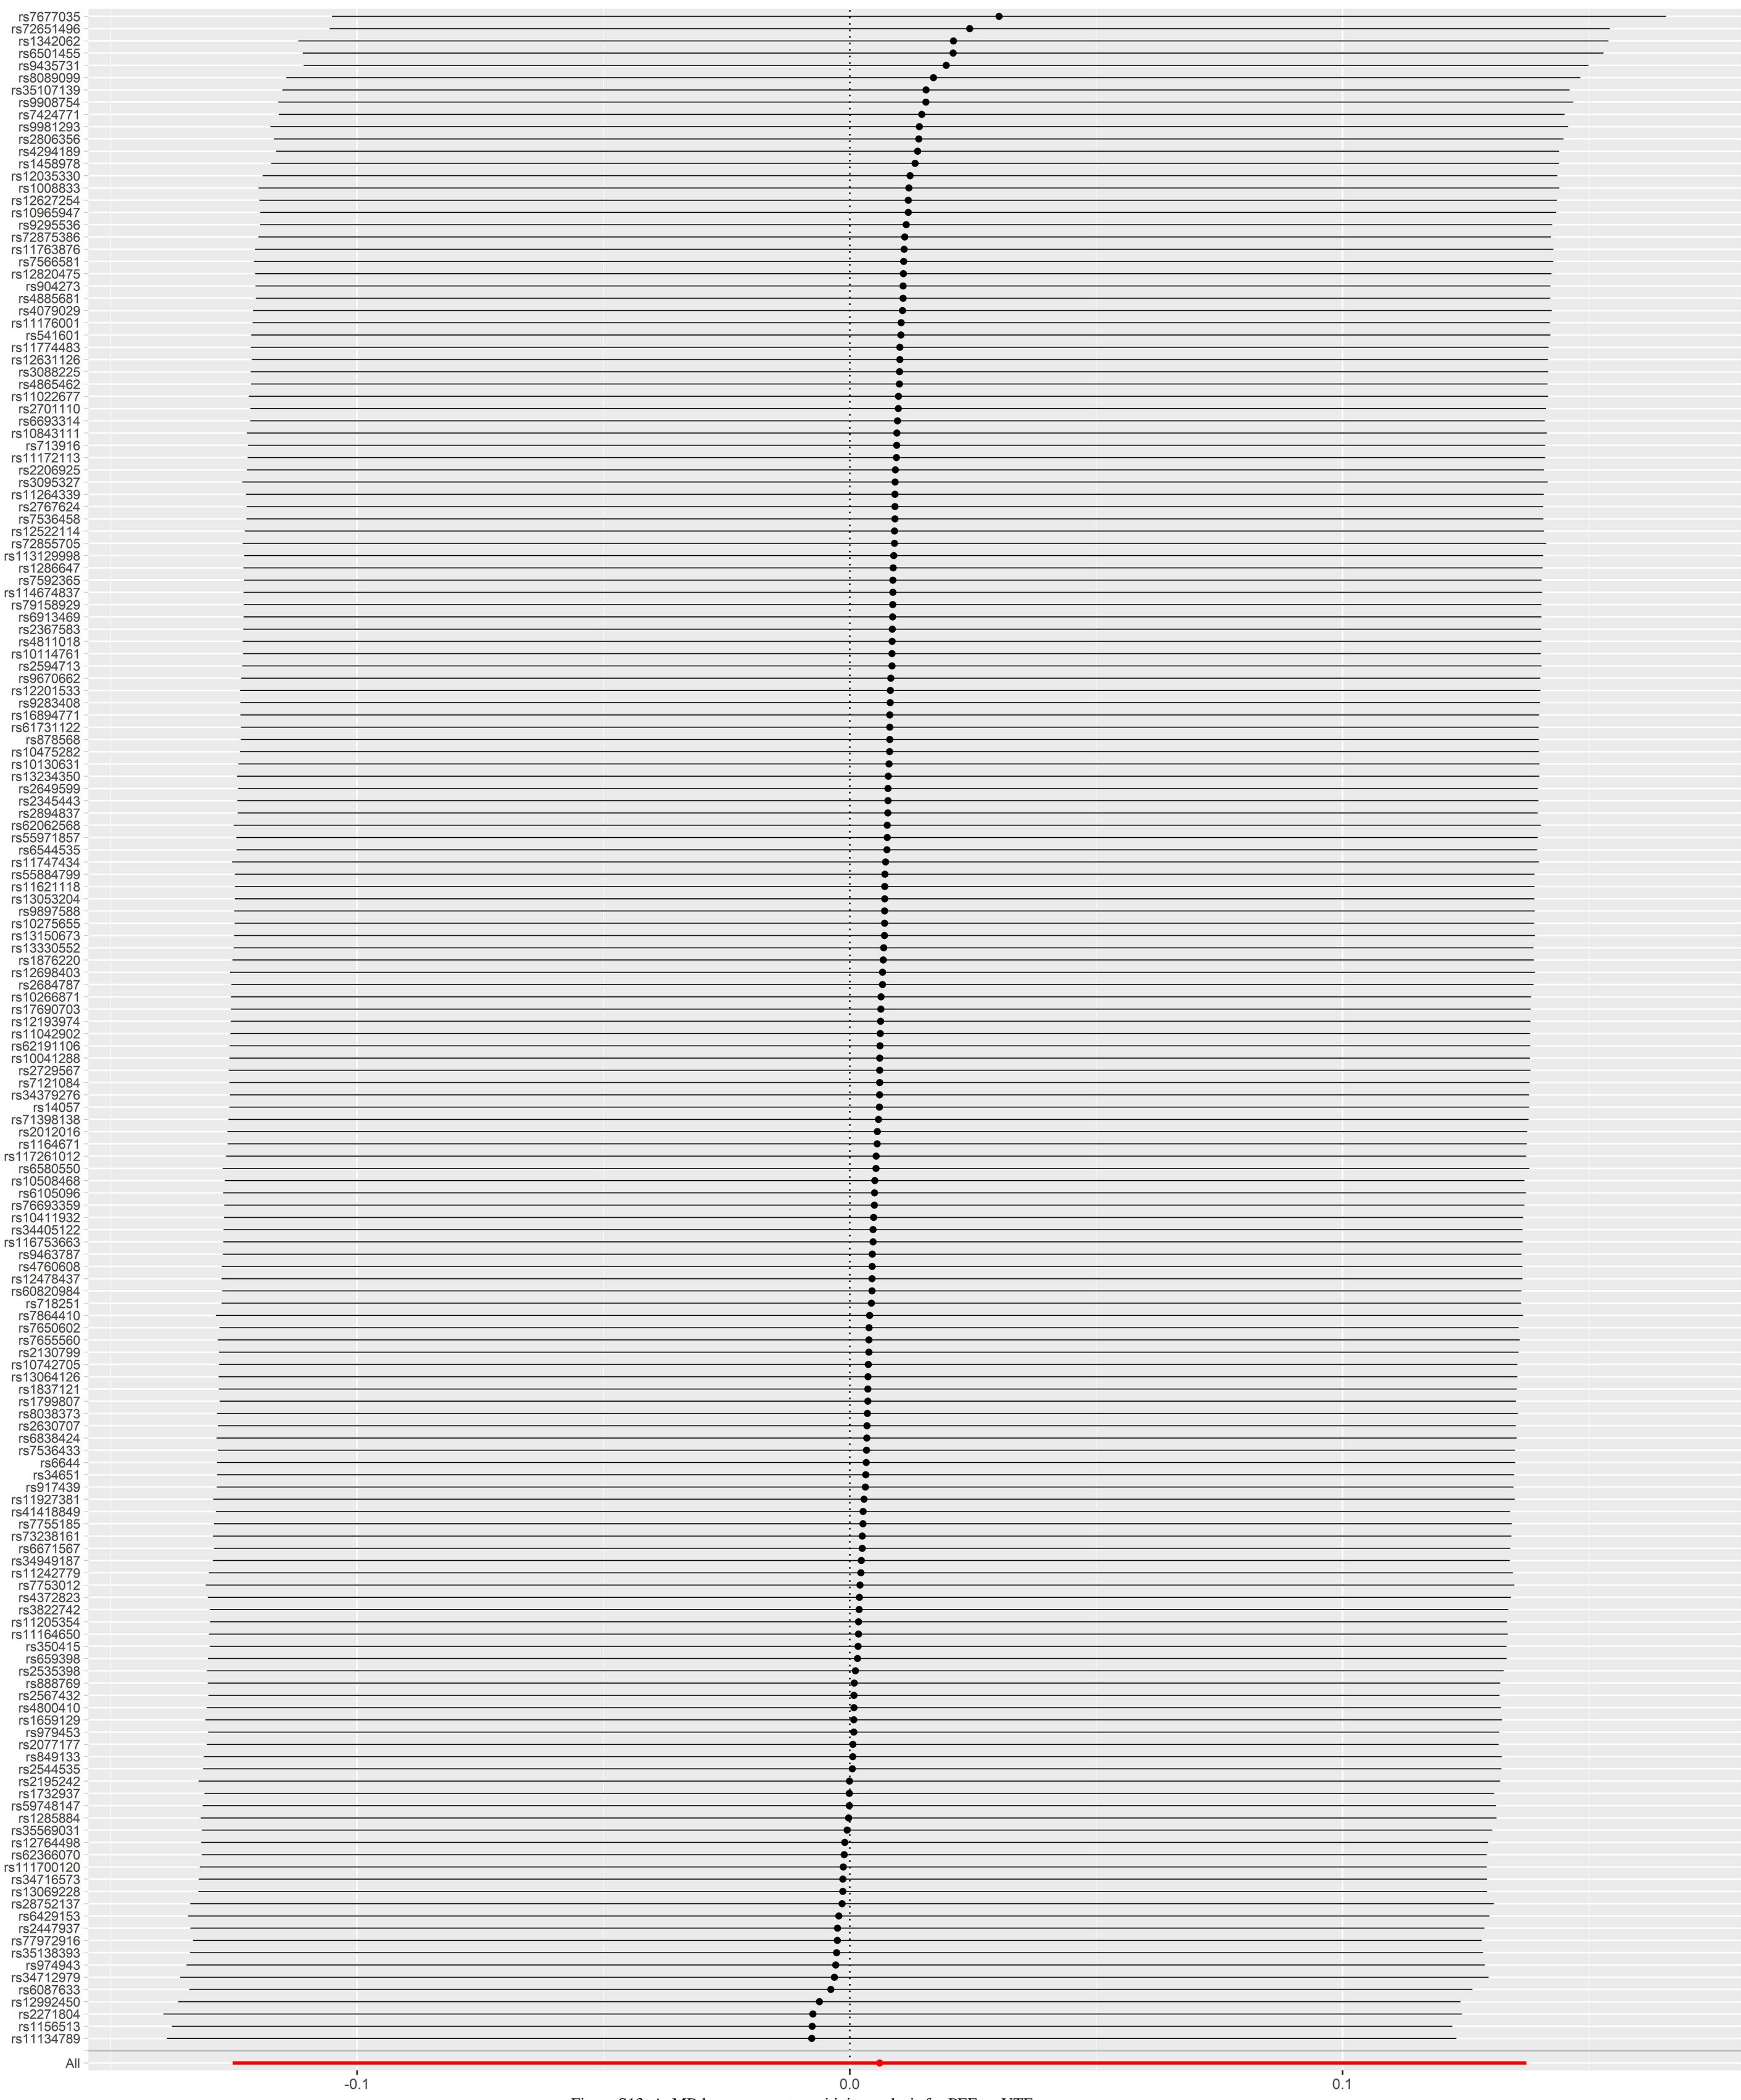

Figure S13. A. MR leave-one-out sensitivity analysis for PEF on VTE

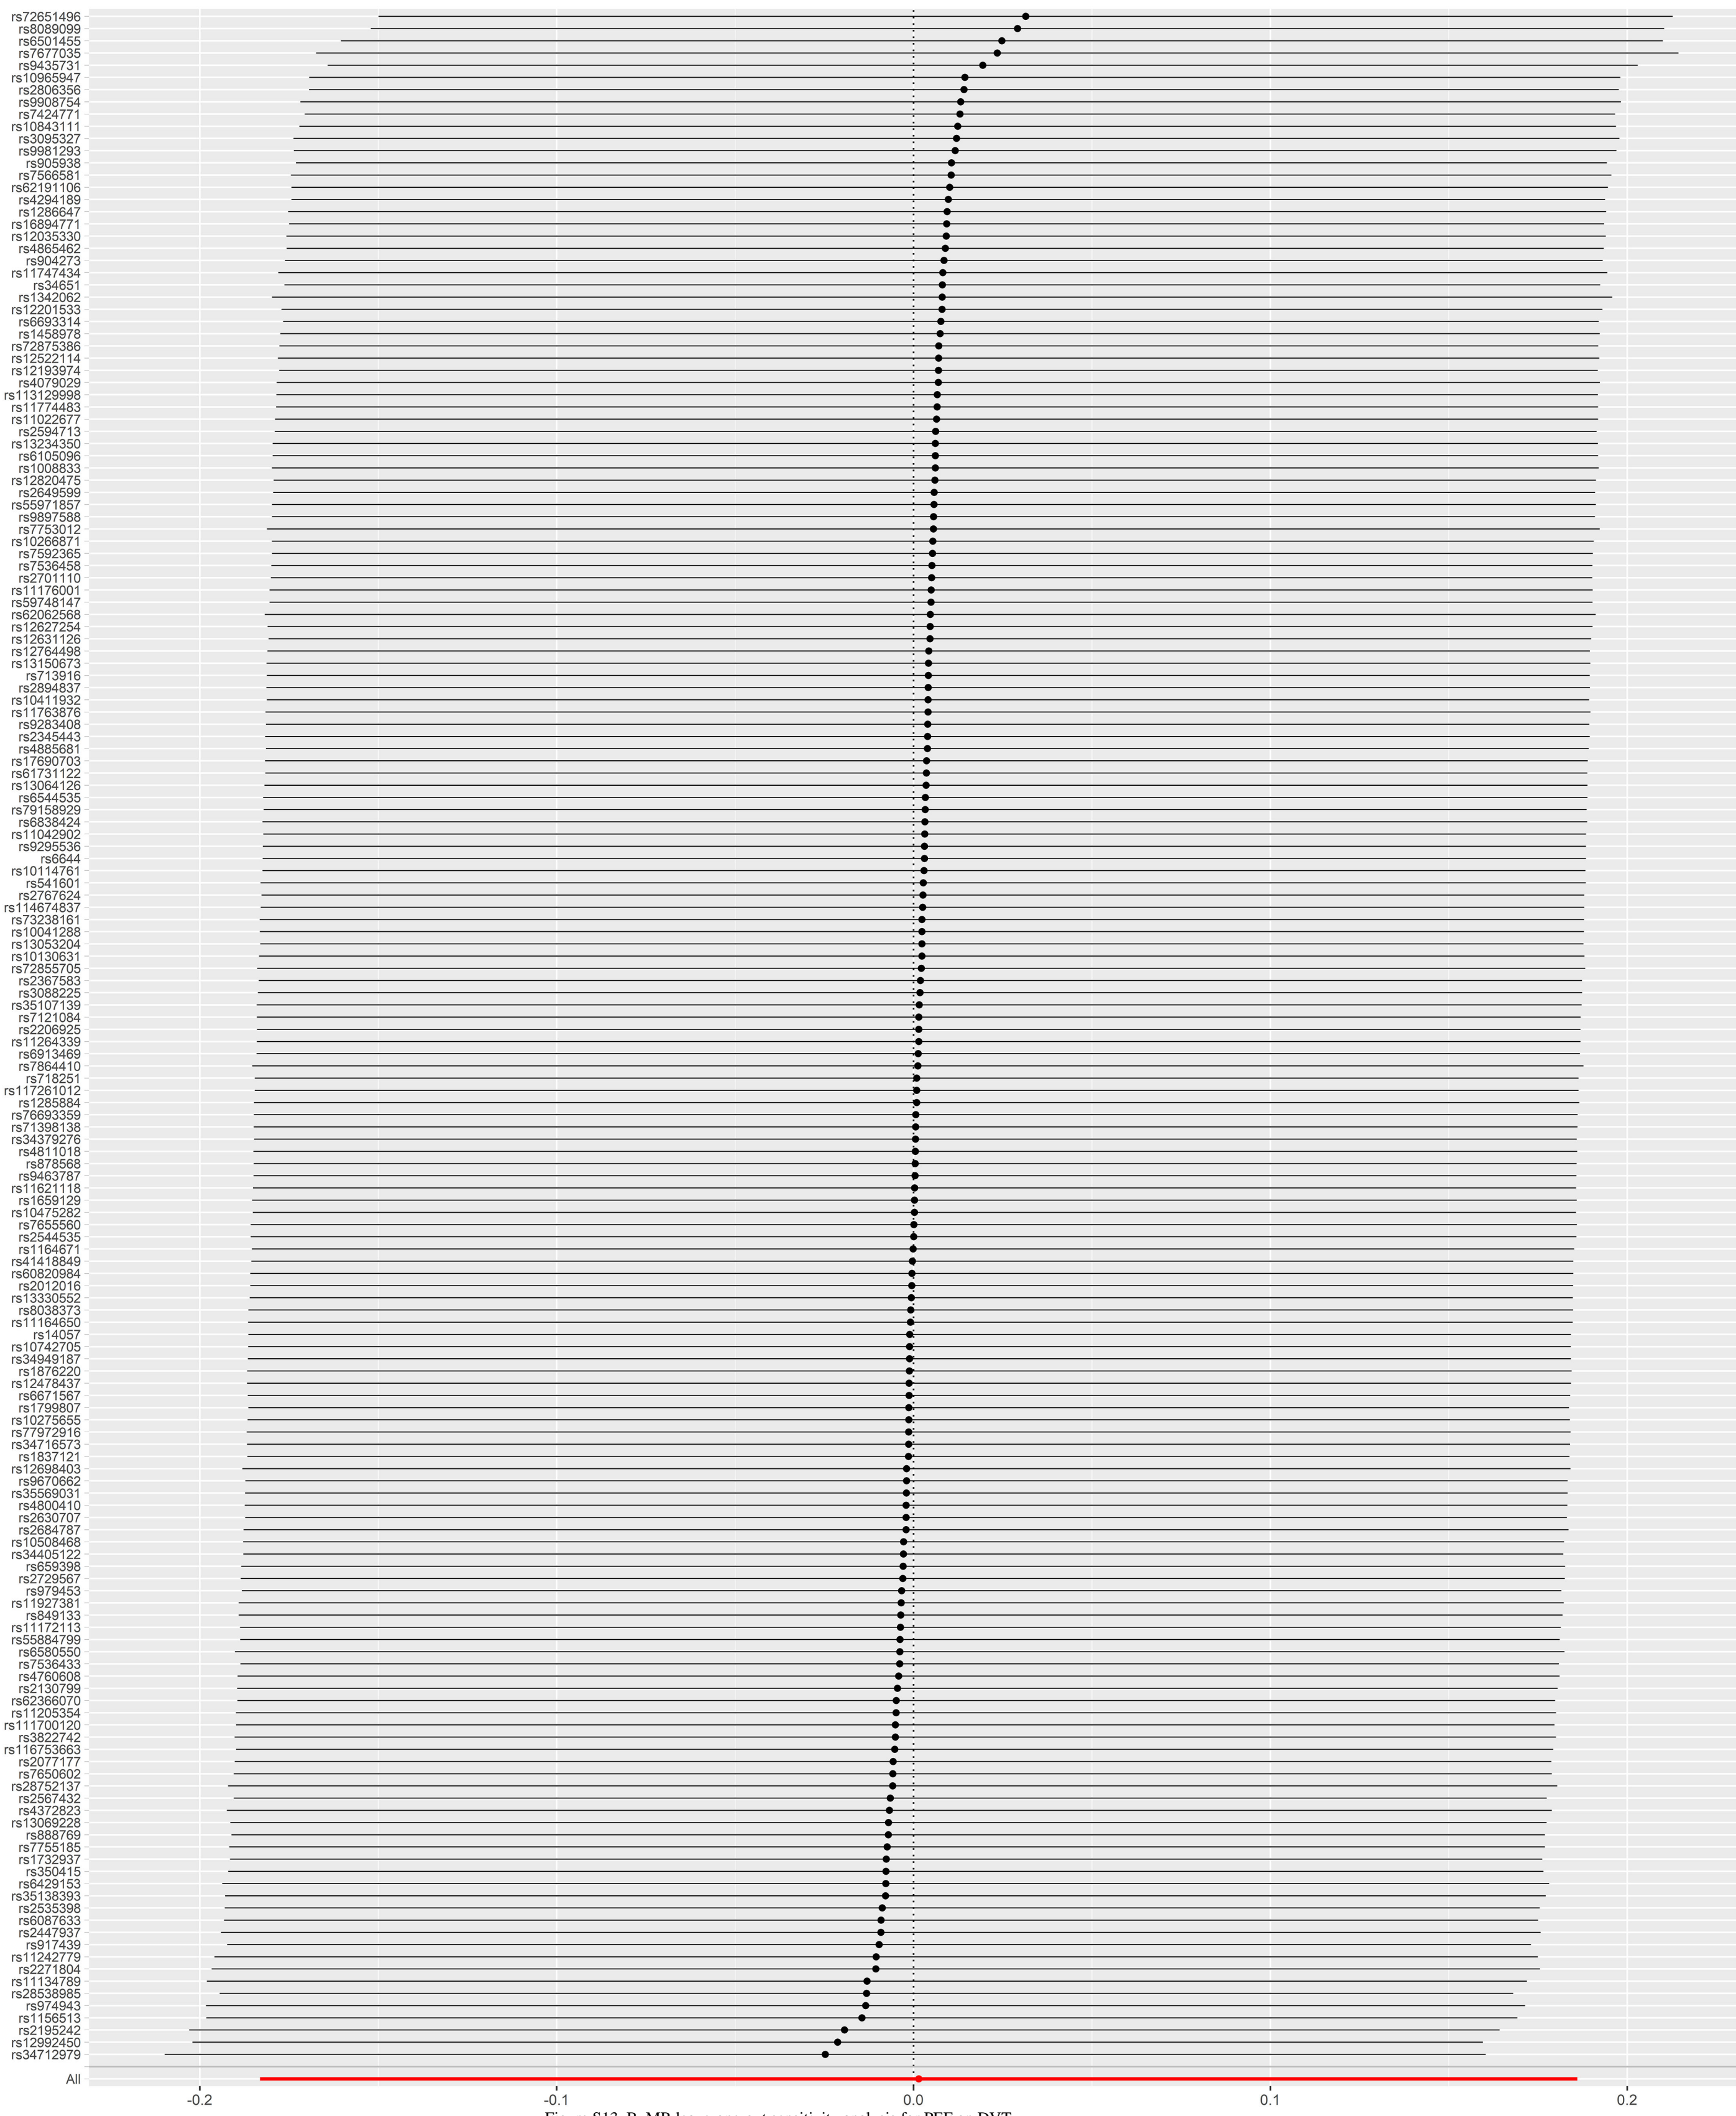

Figure S13. B. MR leave-one-out sensitivity analysis for PEF on DVT

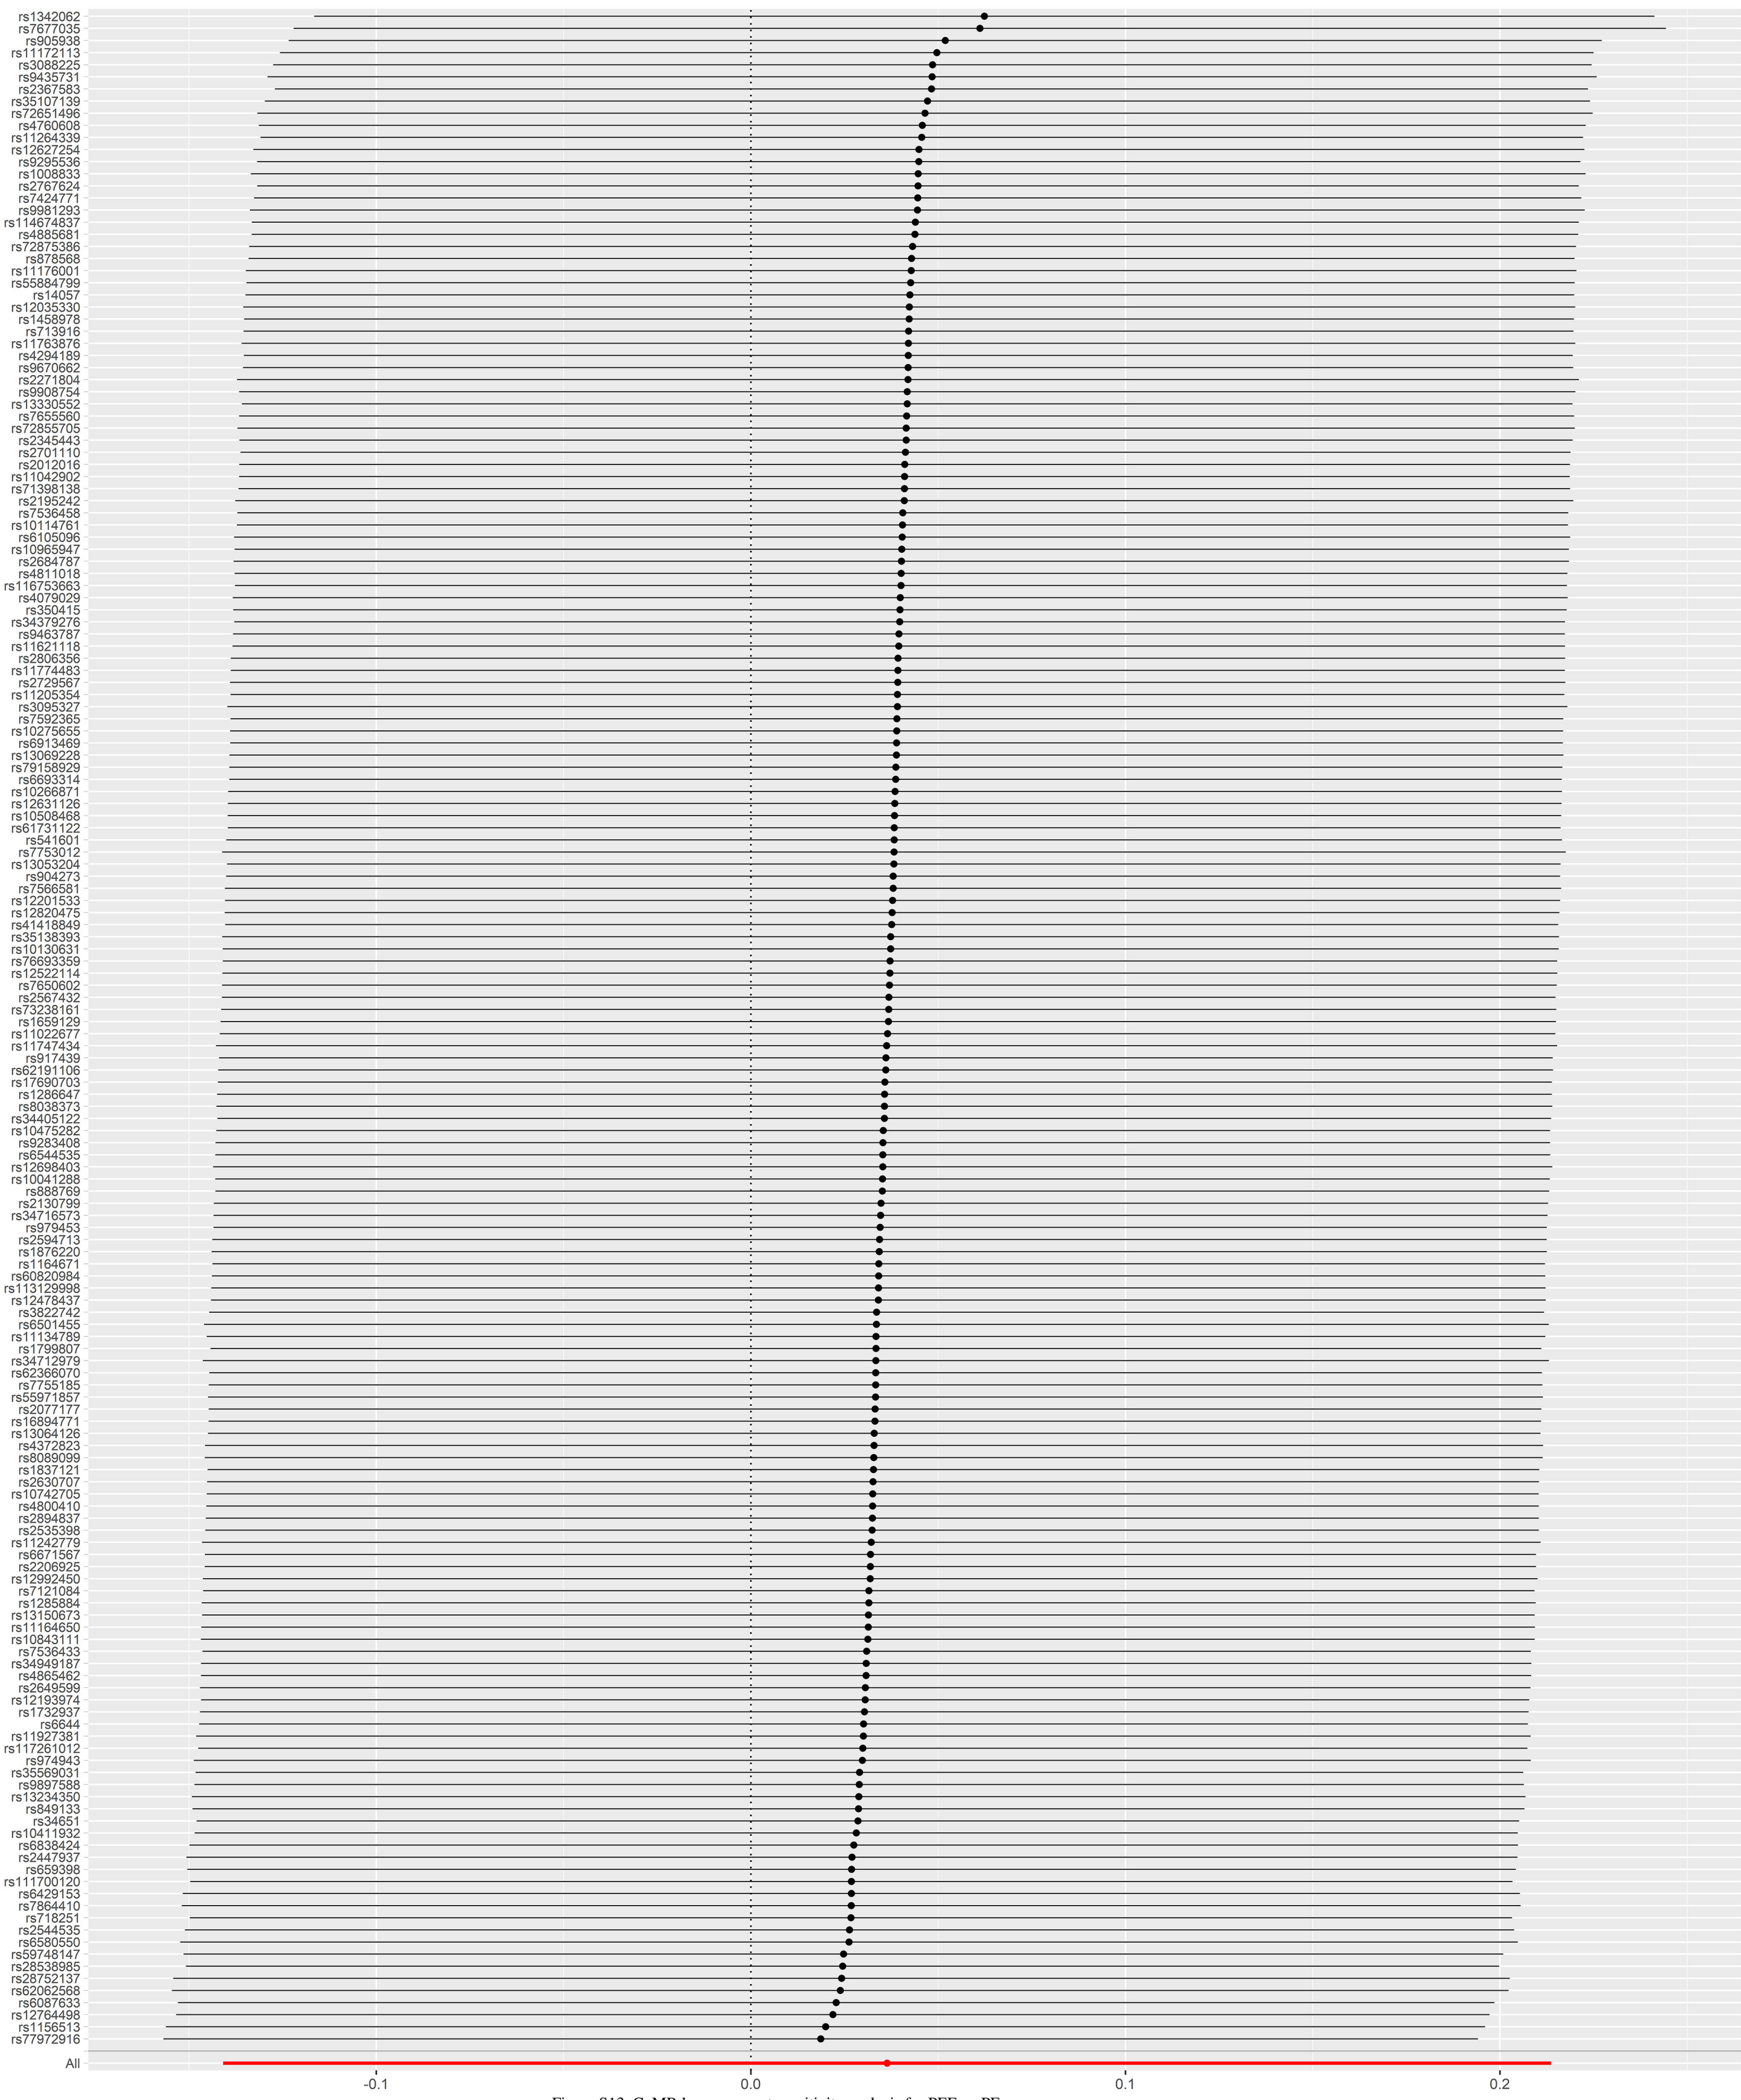

Figure S13. C. MR leave-one-out sensitivity analysis for PEF on PE
