# Supplementary material for: Genetic association and causal inference between lung function and venous thromboembolism
Source: PubMed Central journal article supplement (PMC9885683; doi:10.1186/s12931-023-02335-3), 2023-01-30
Supplement: 12931_2023_2335_MOESM5_ESM.pdf [file 12931_2023_2335_MOESM5_ESM.pdf]

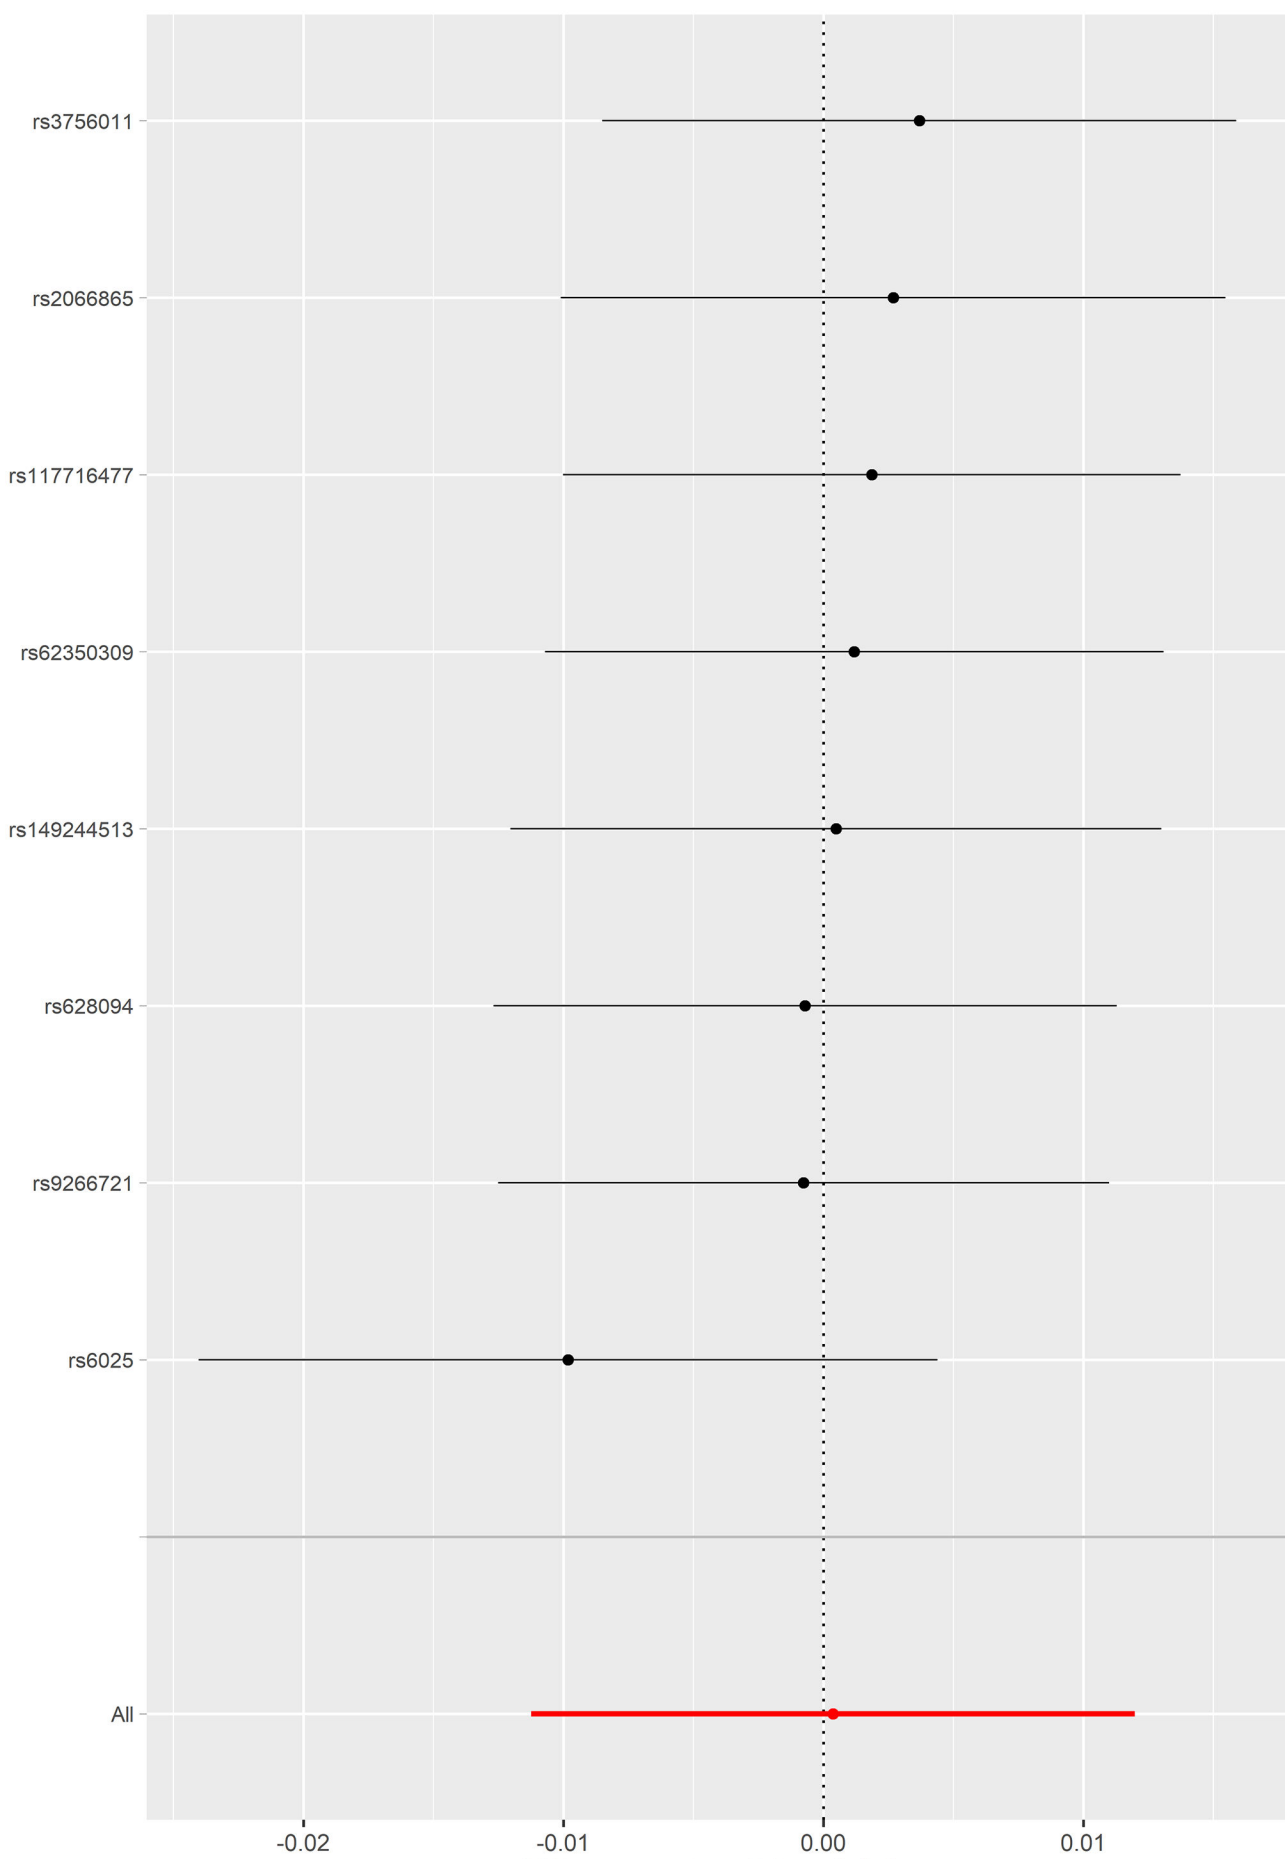

Figure S14. A. MR leave-one-out sensitivity analysis for VTE on FEV1

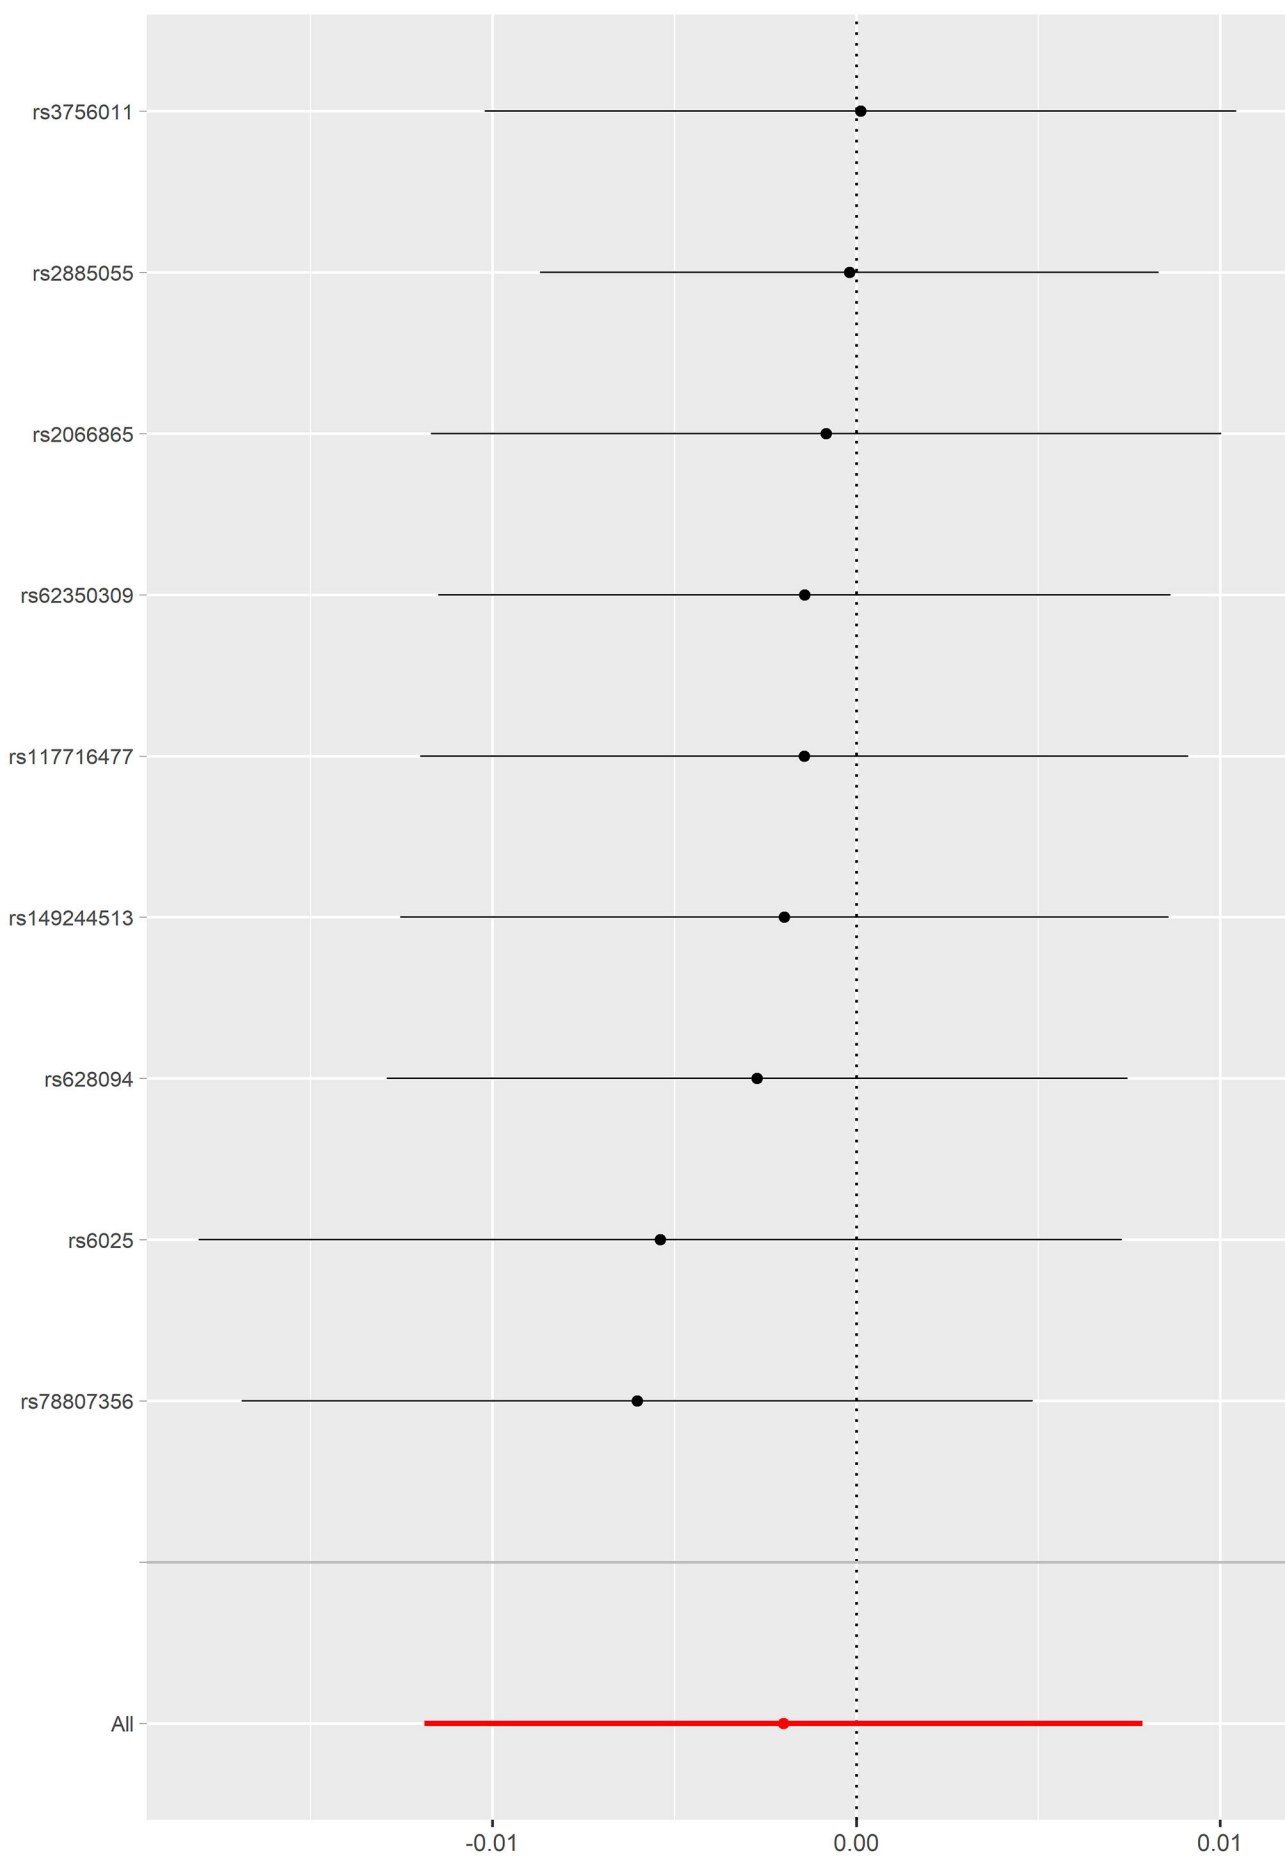

Figure S14. B. MR leave-one-out sensitivity analysis for VTE on FVC

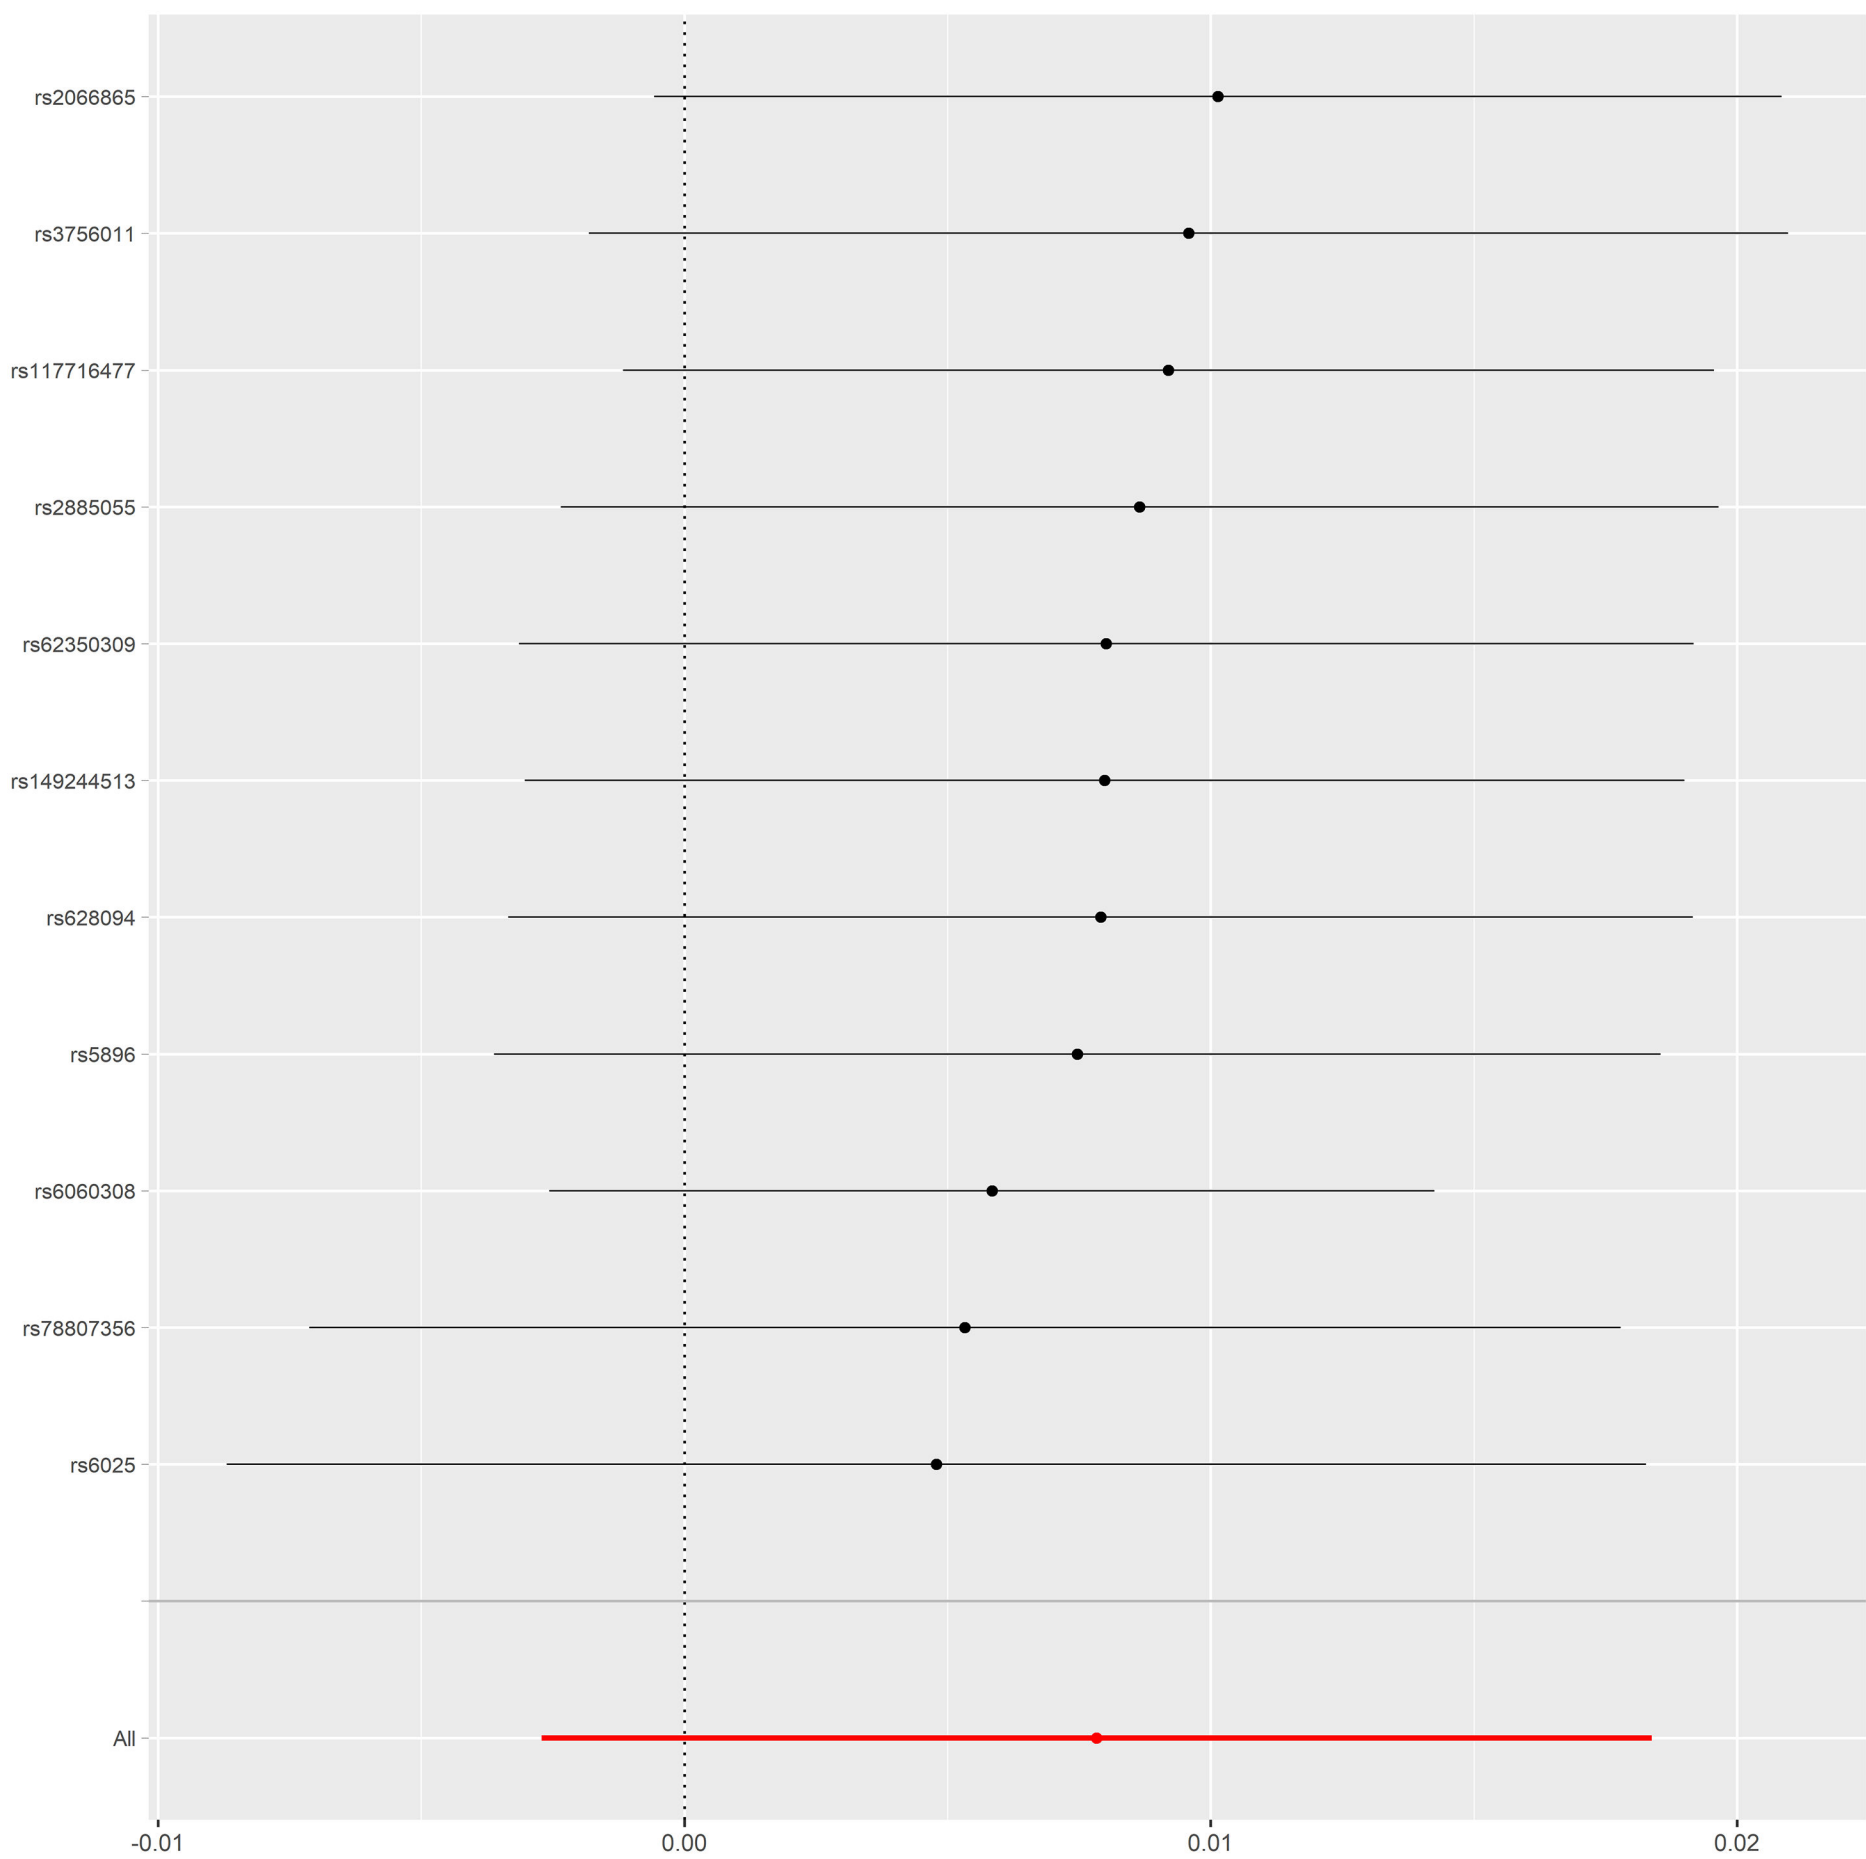

Figure S14. C. MR leave-one-out sensitivity analysis for VTE on FEV1/FVC

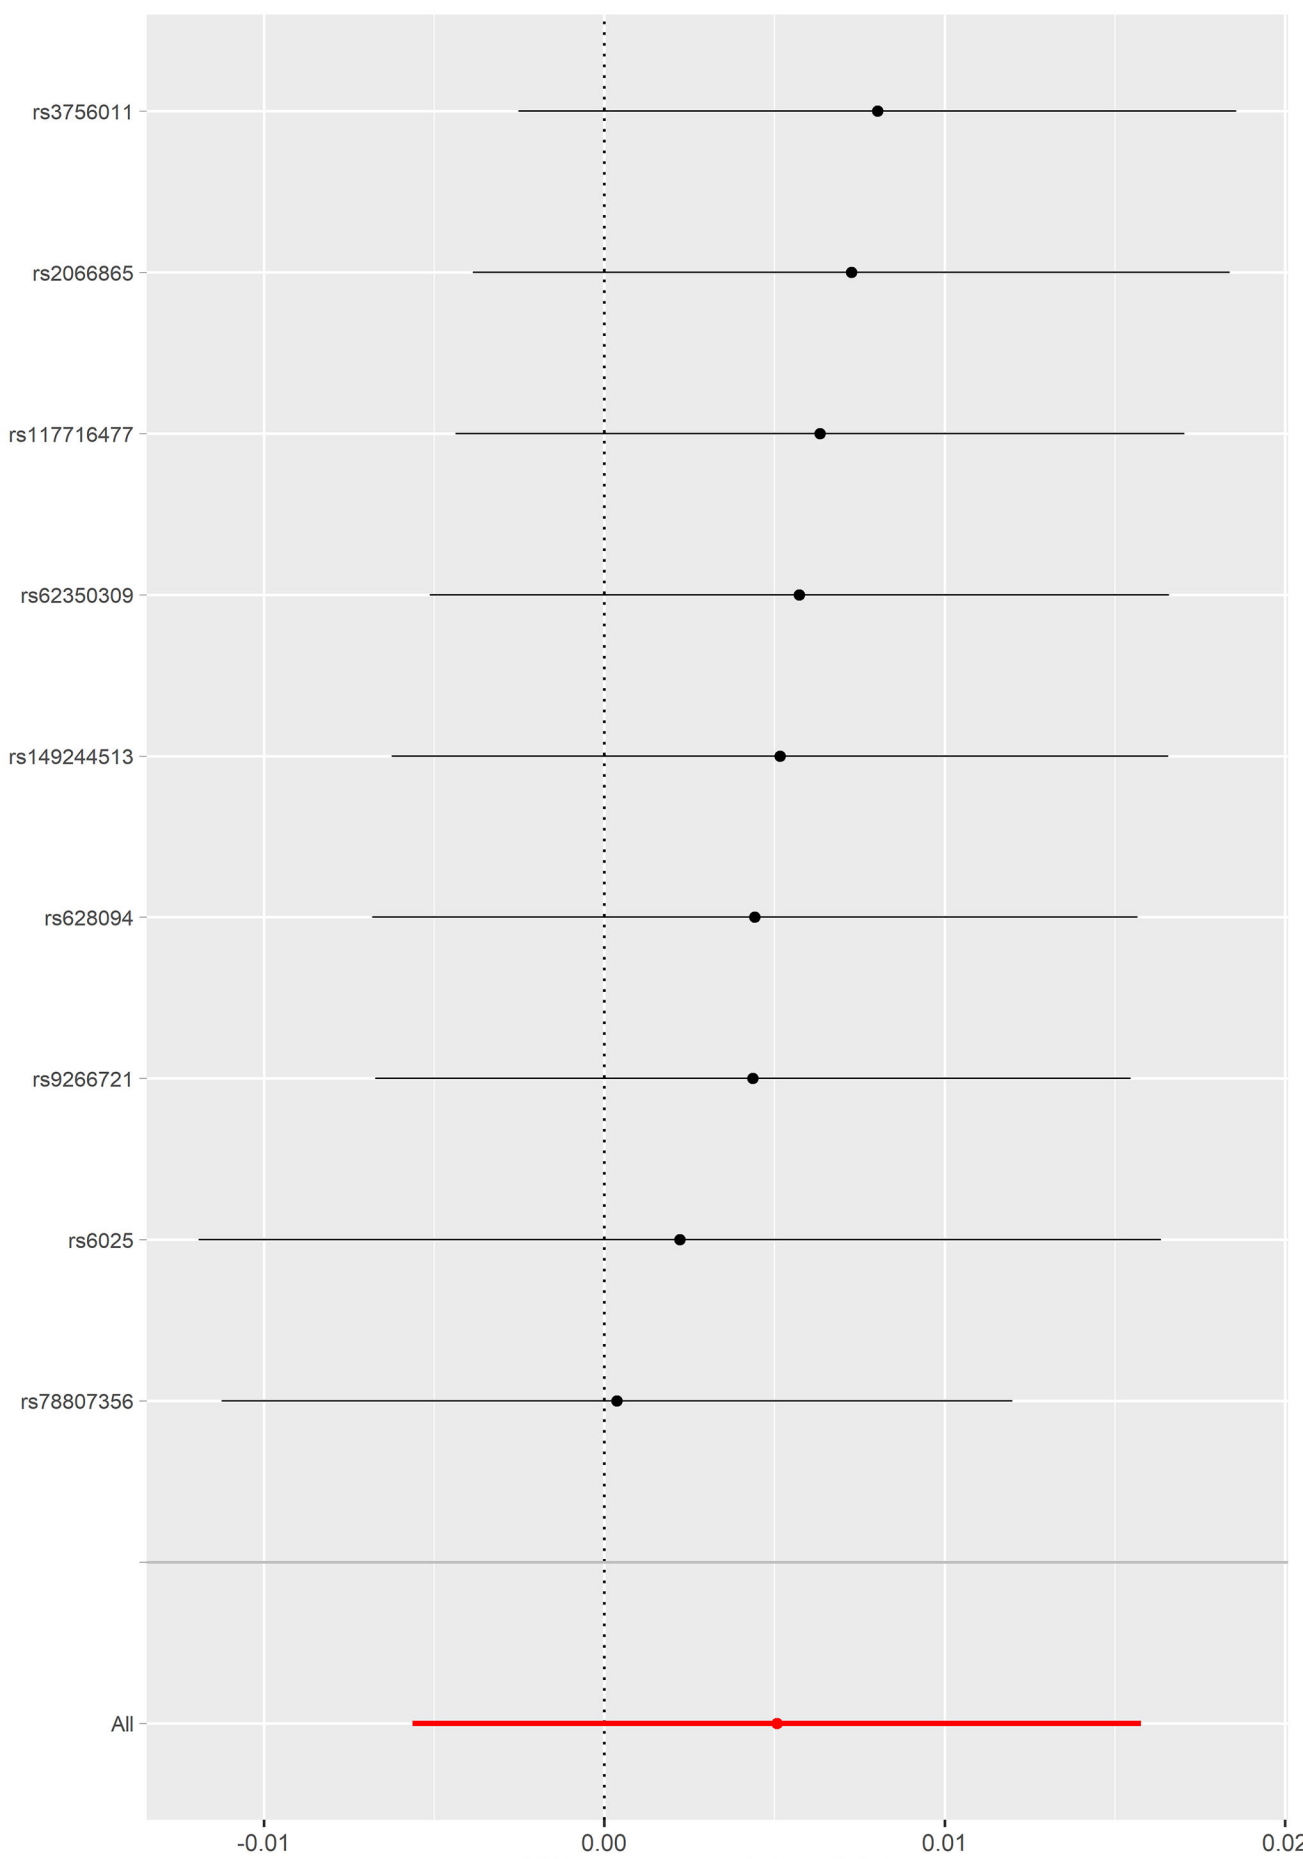

Figure S14. D. MR leave-one-out sensitivity analysis for VTE on PEF

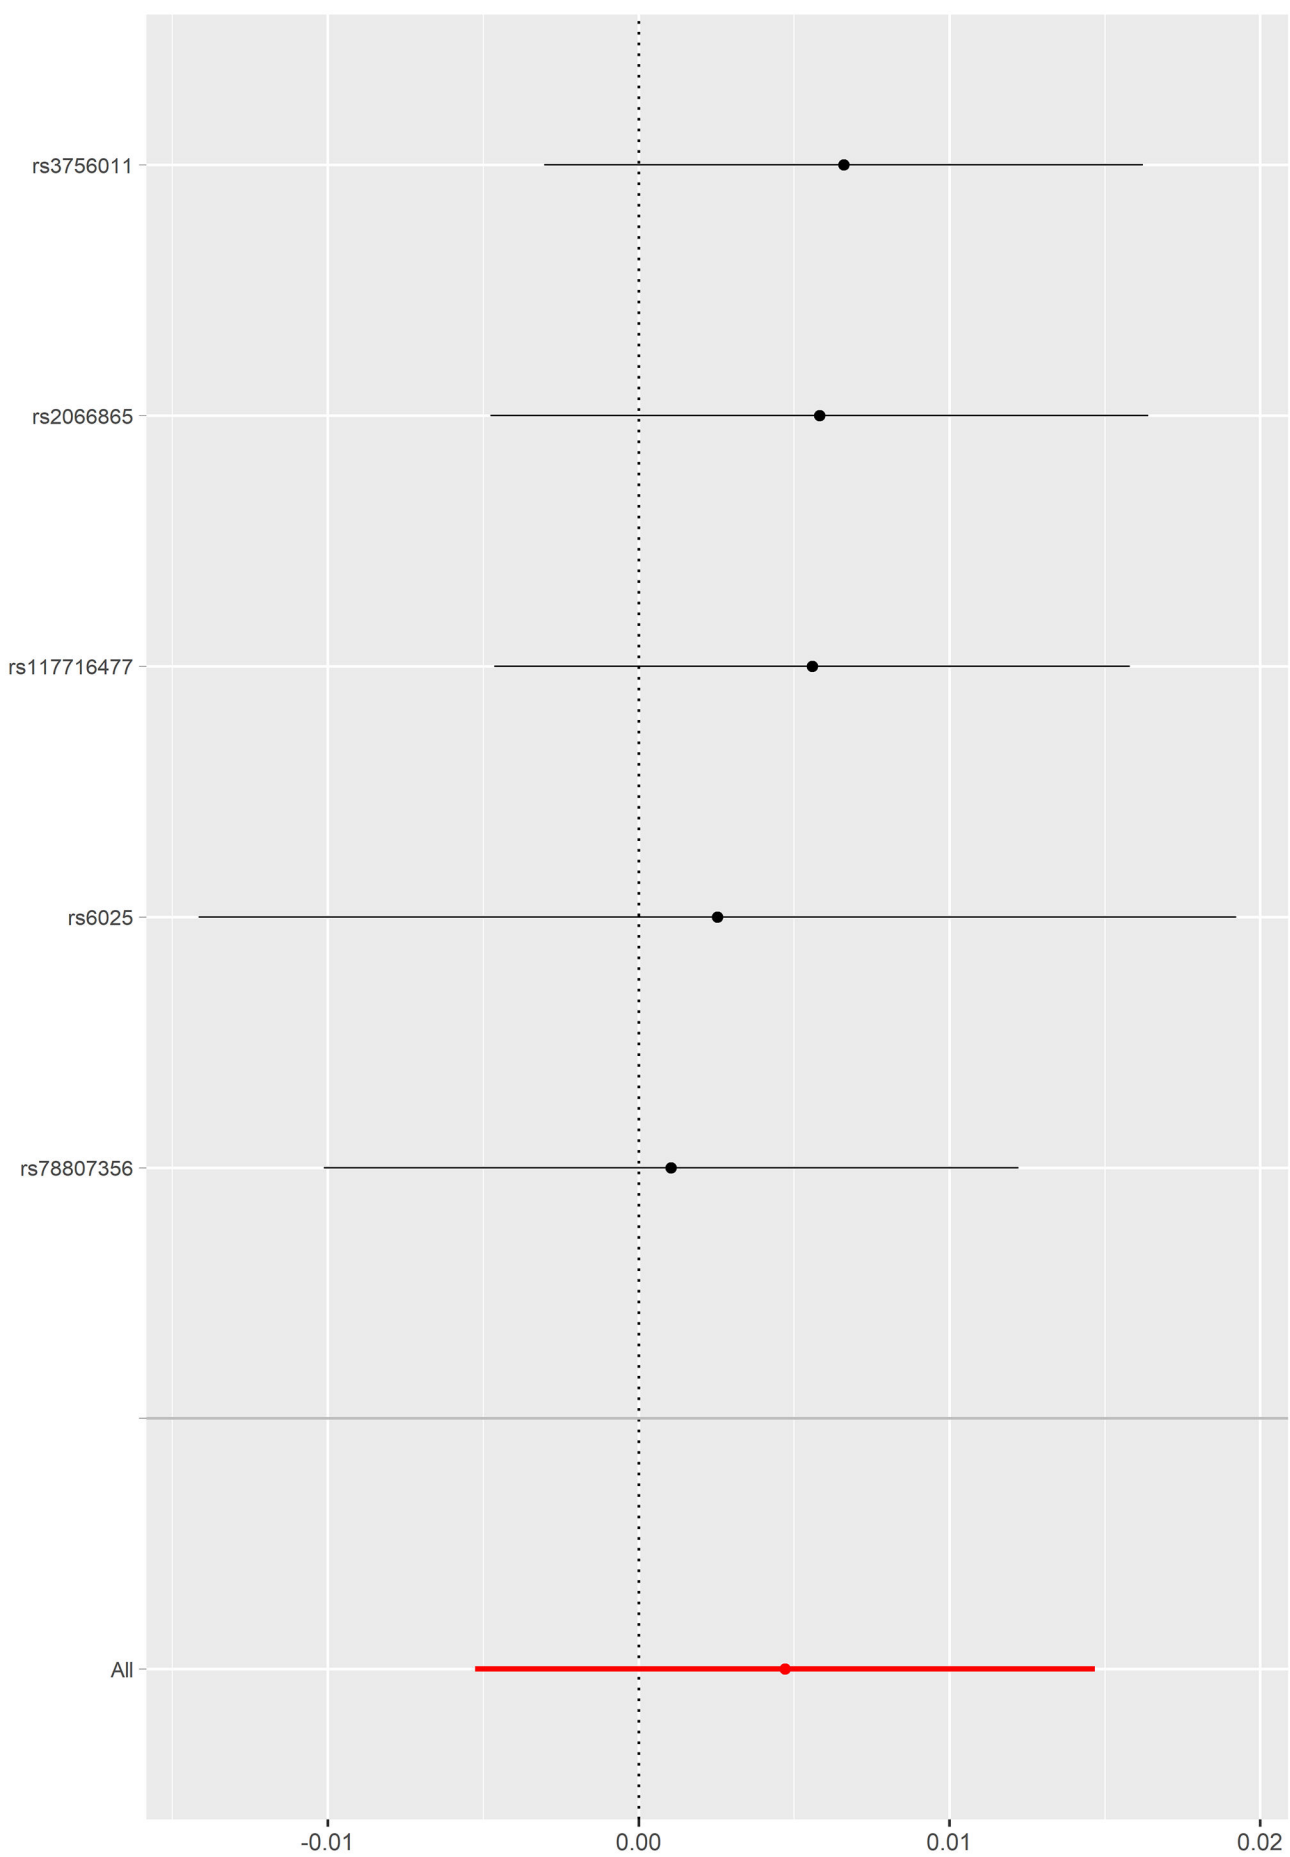

Figure S15. A. MR leave-one-out sensitivity analysis for DVT on FEV1

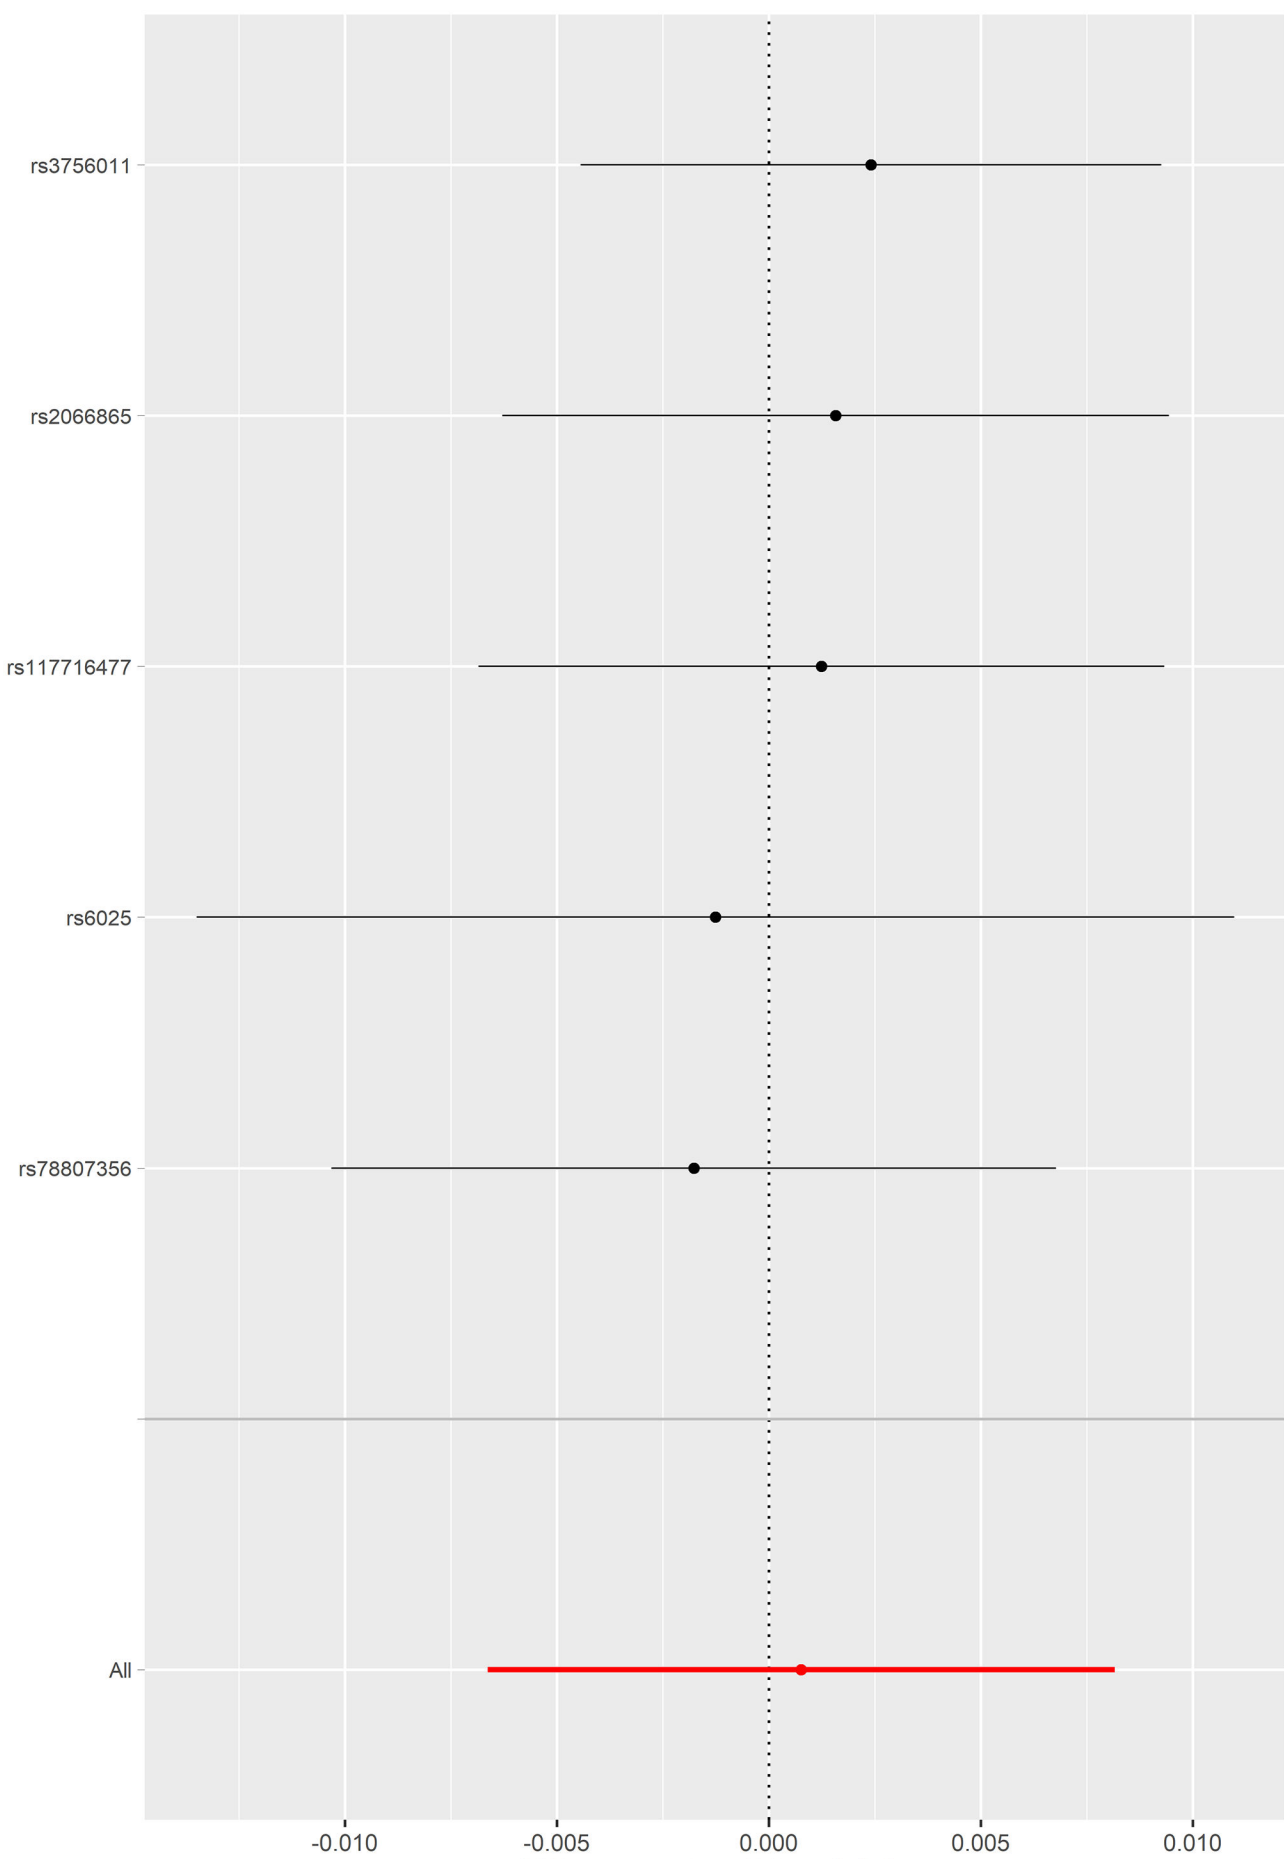

Figure S15. B. MR leave-one-out sensitivity analysis for DVT on FVC

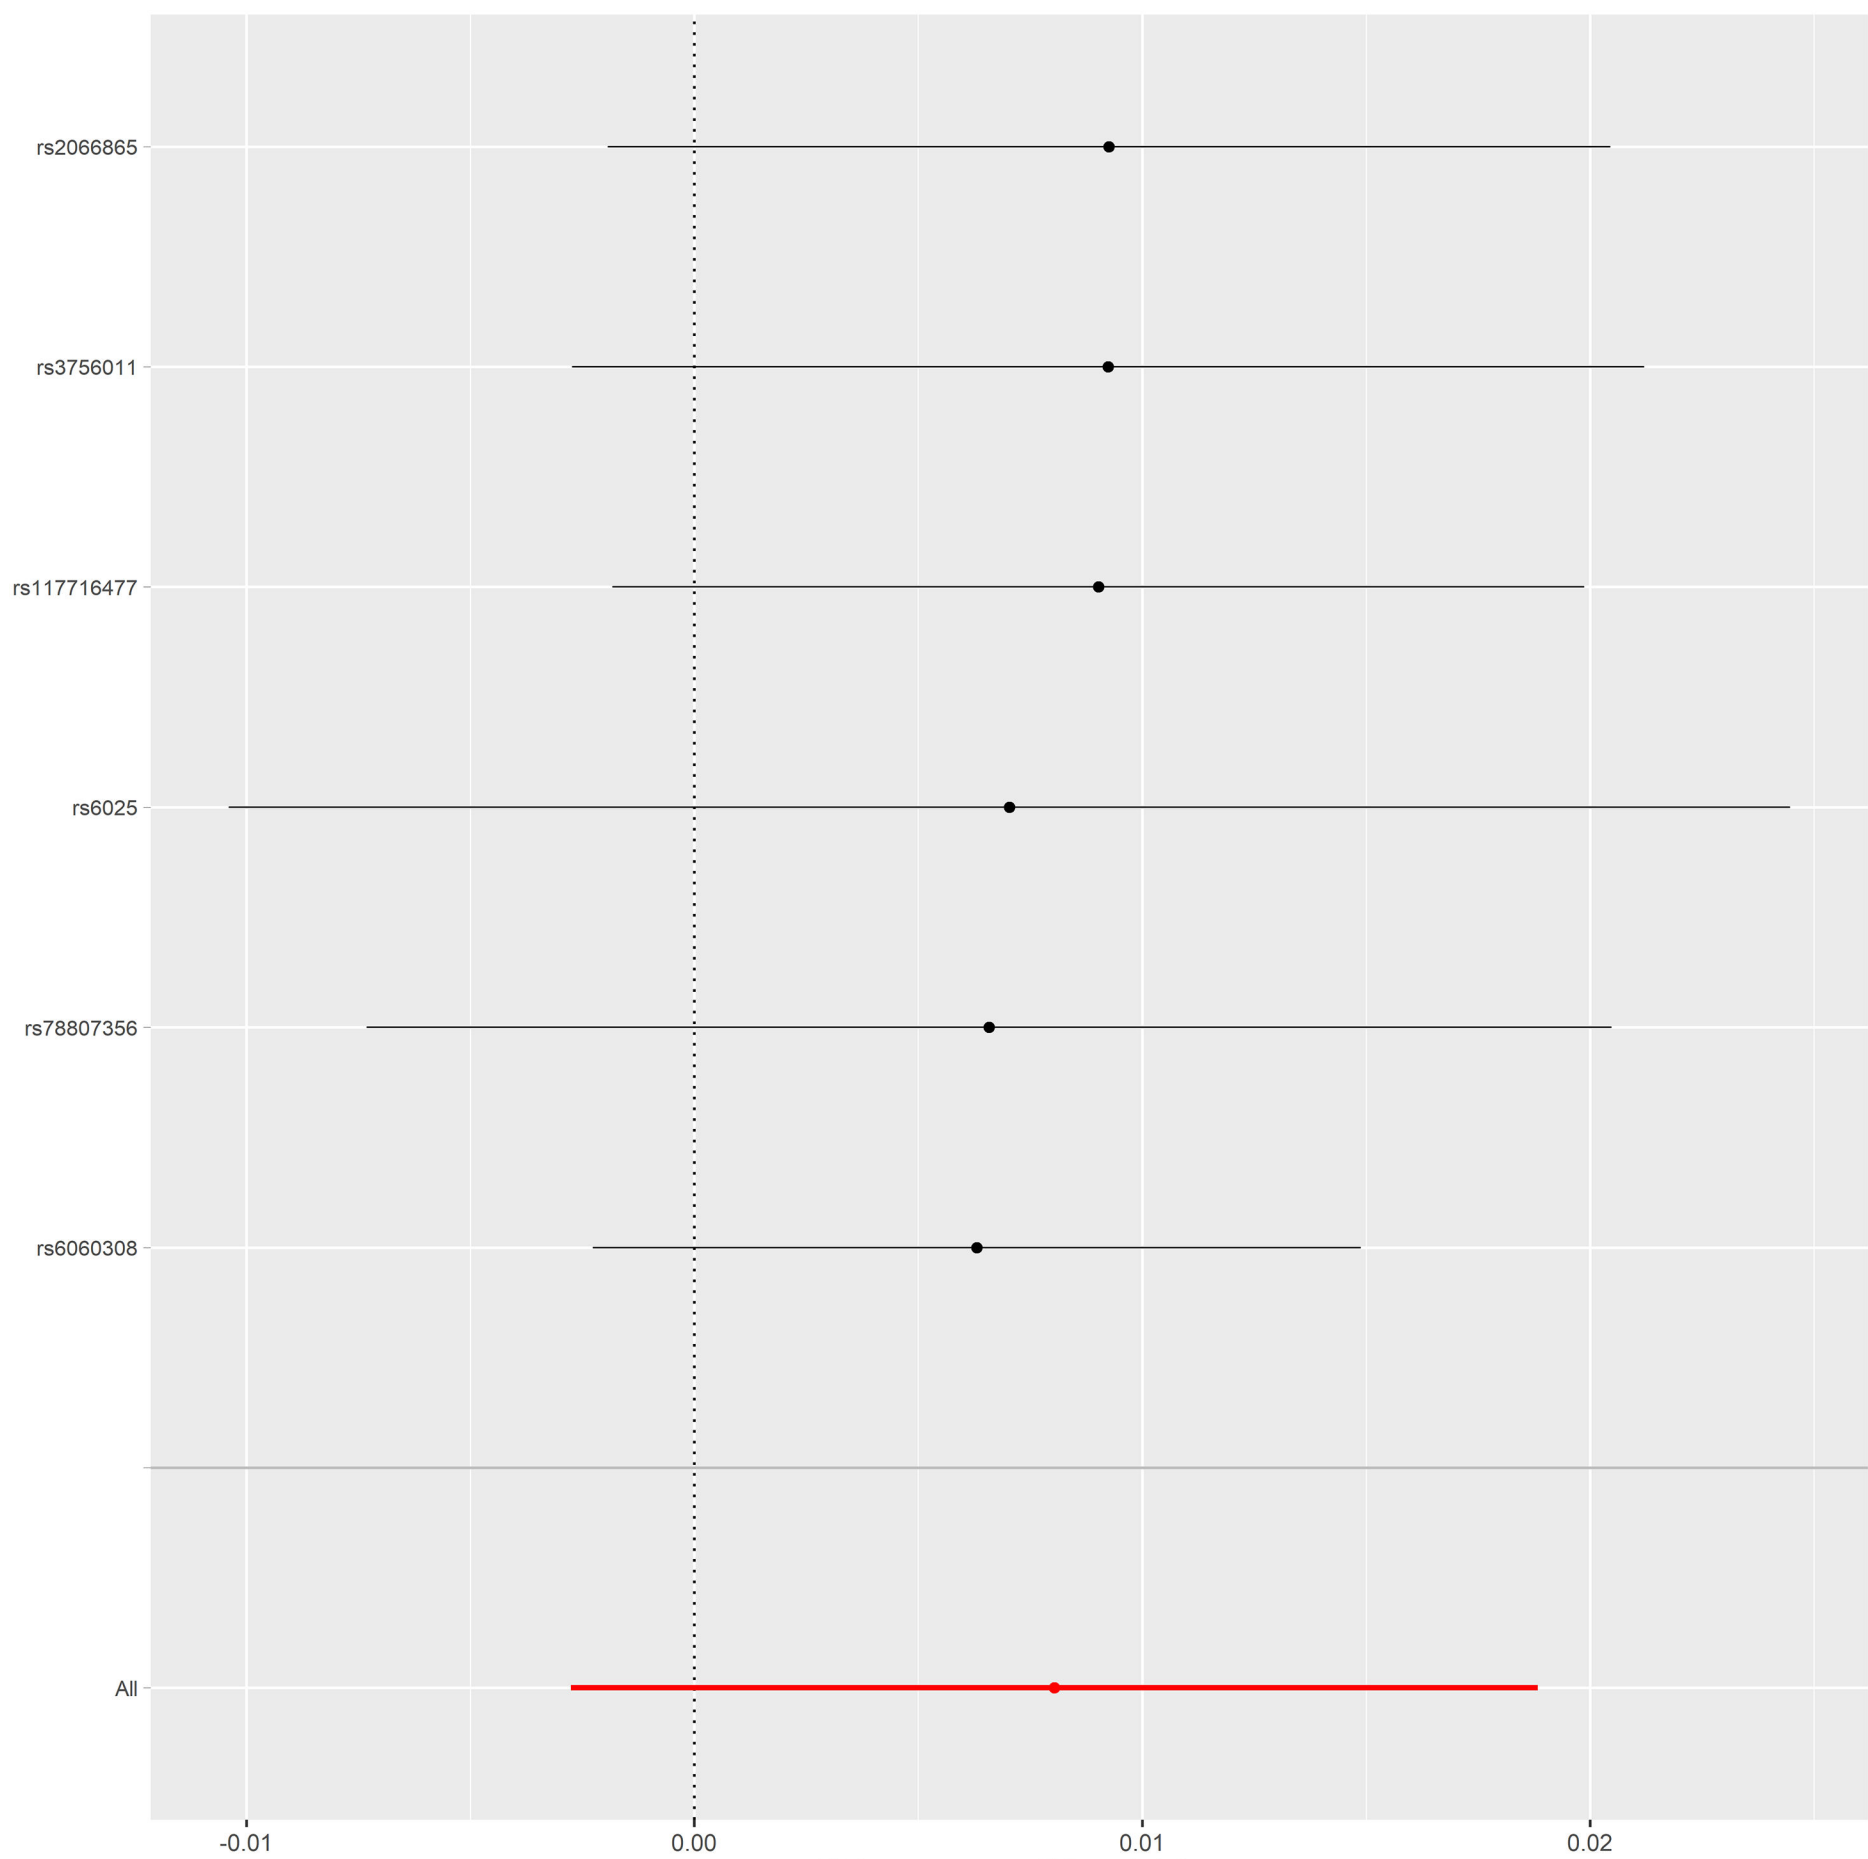

Figure S15. C. MR leave-one-out sensitivity analysis for DVT on FEV1/FVC

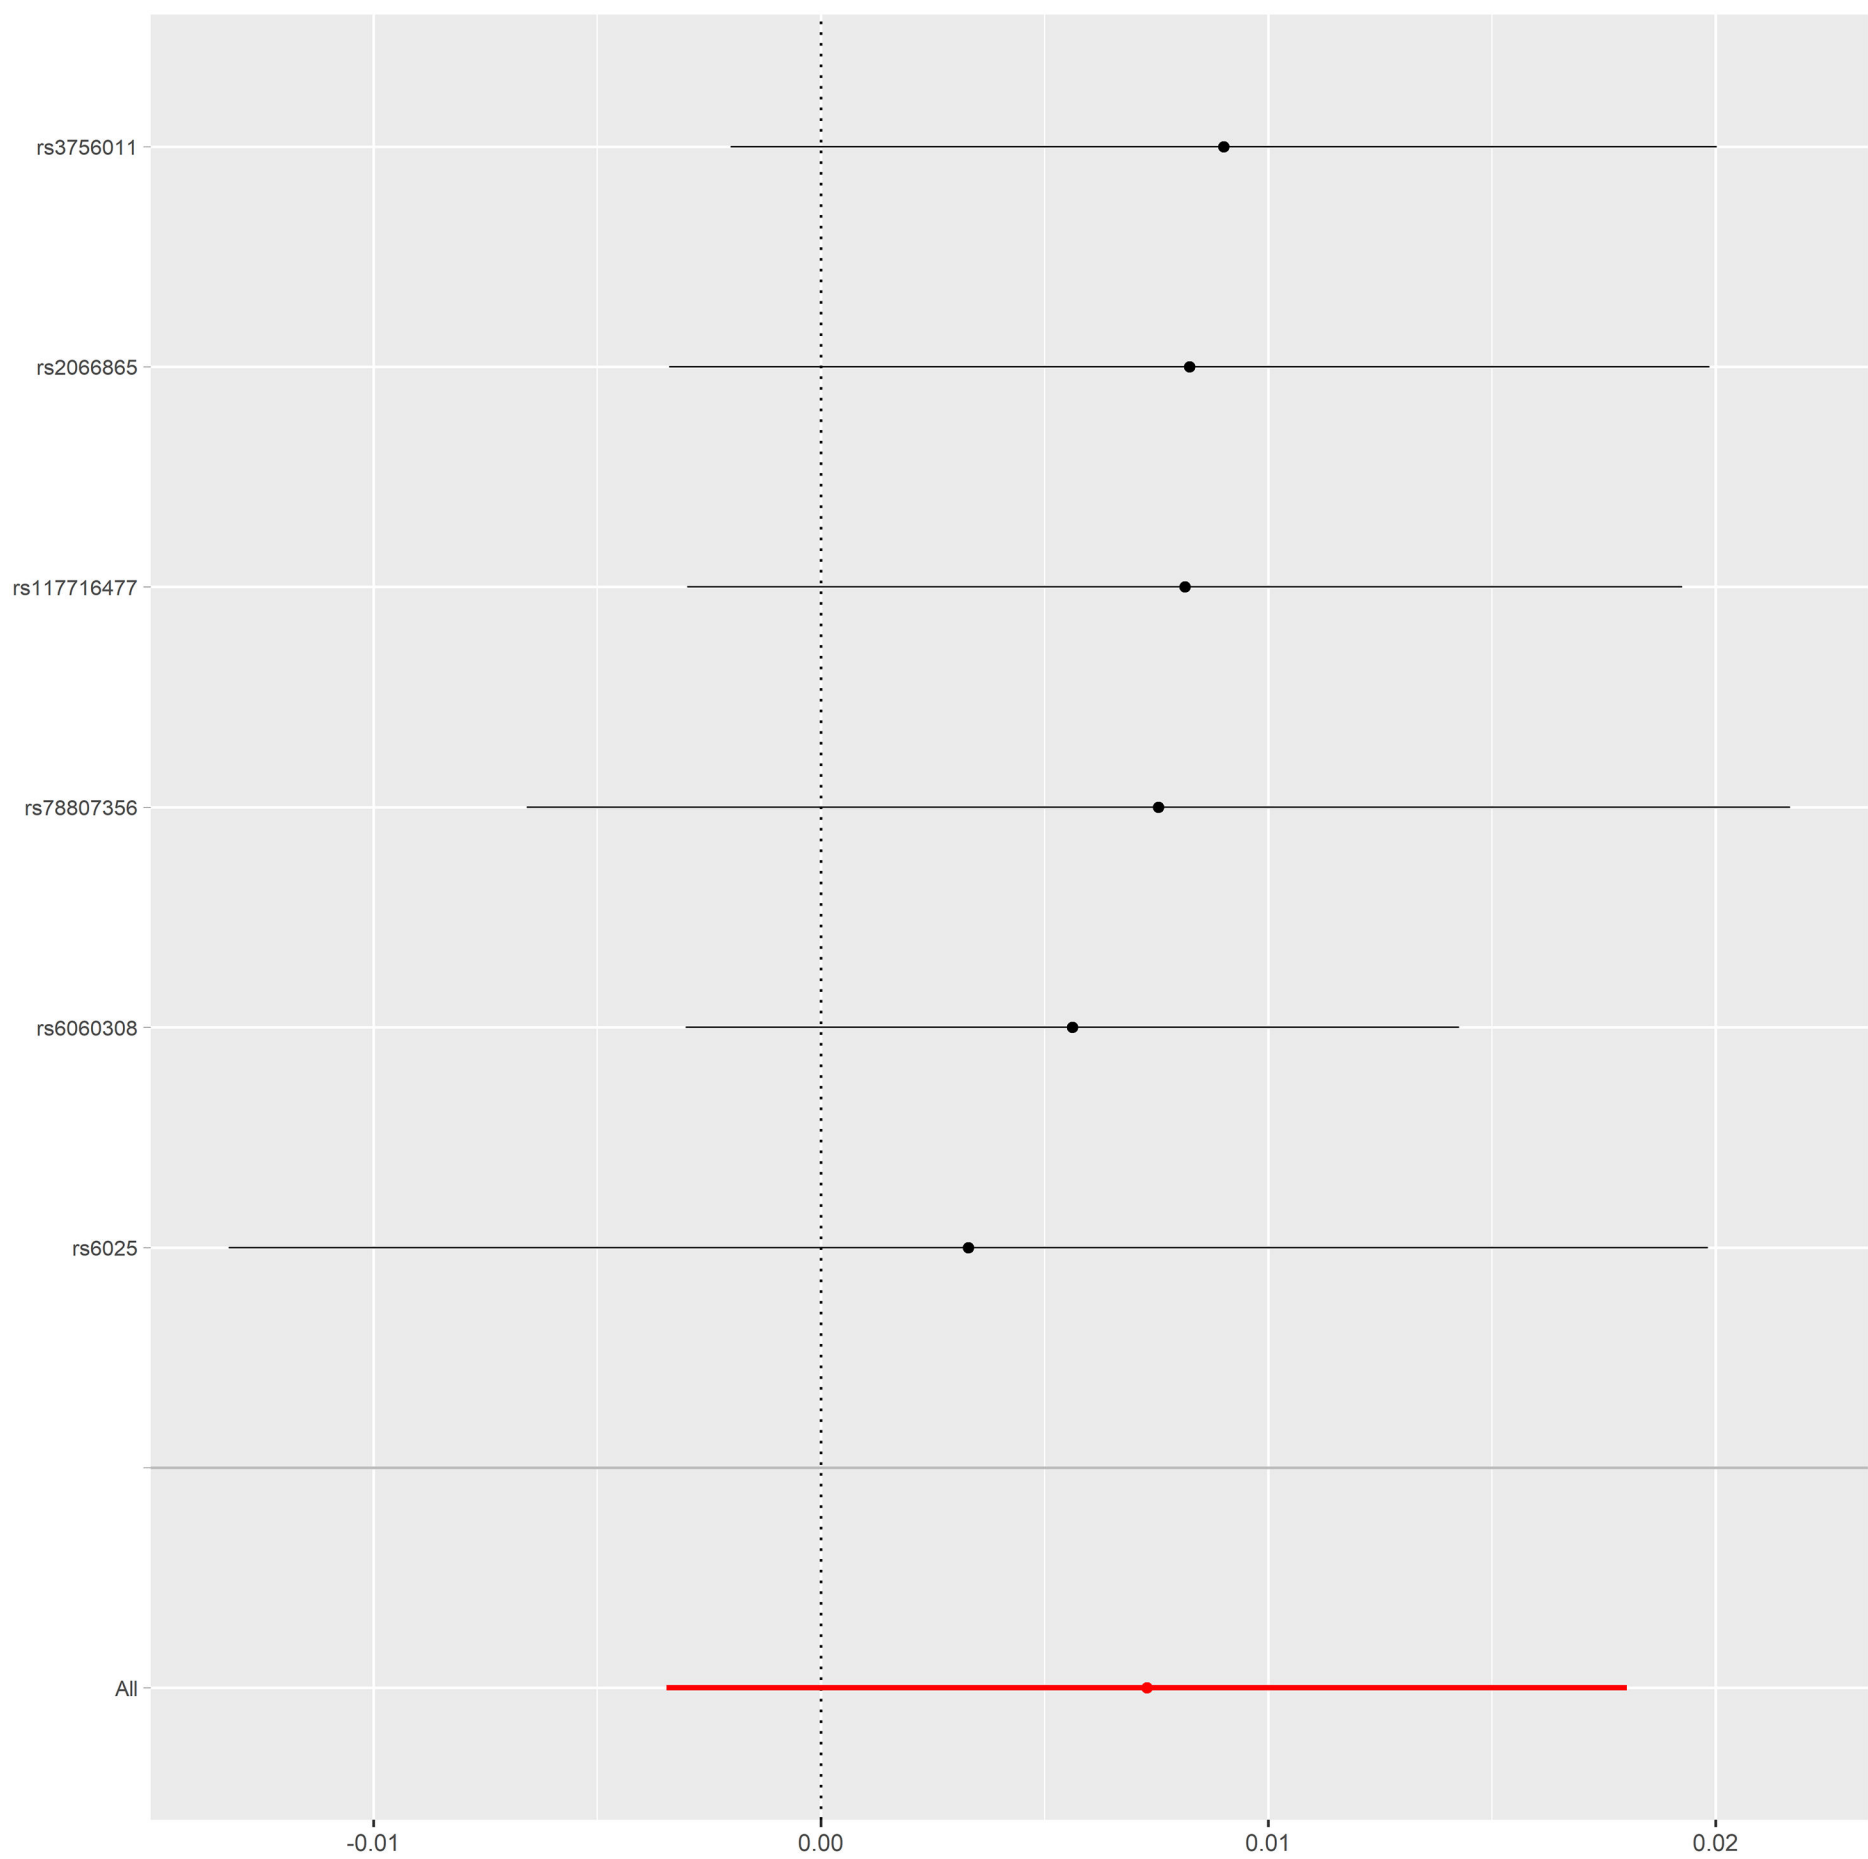

Figure S15. D. MR leave-one-out sensitivity analysis for DVT on PEF



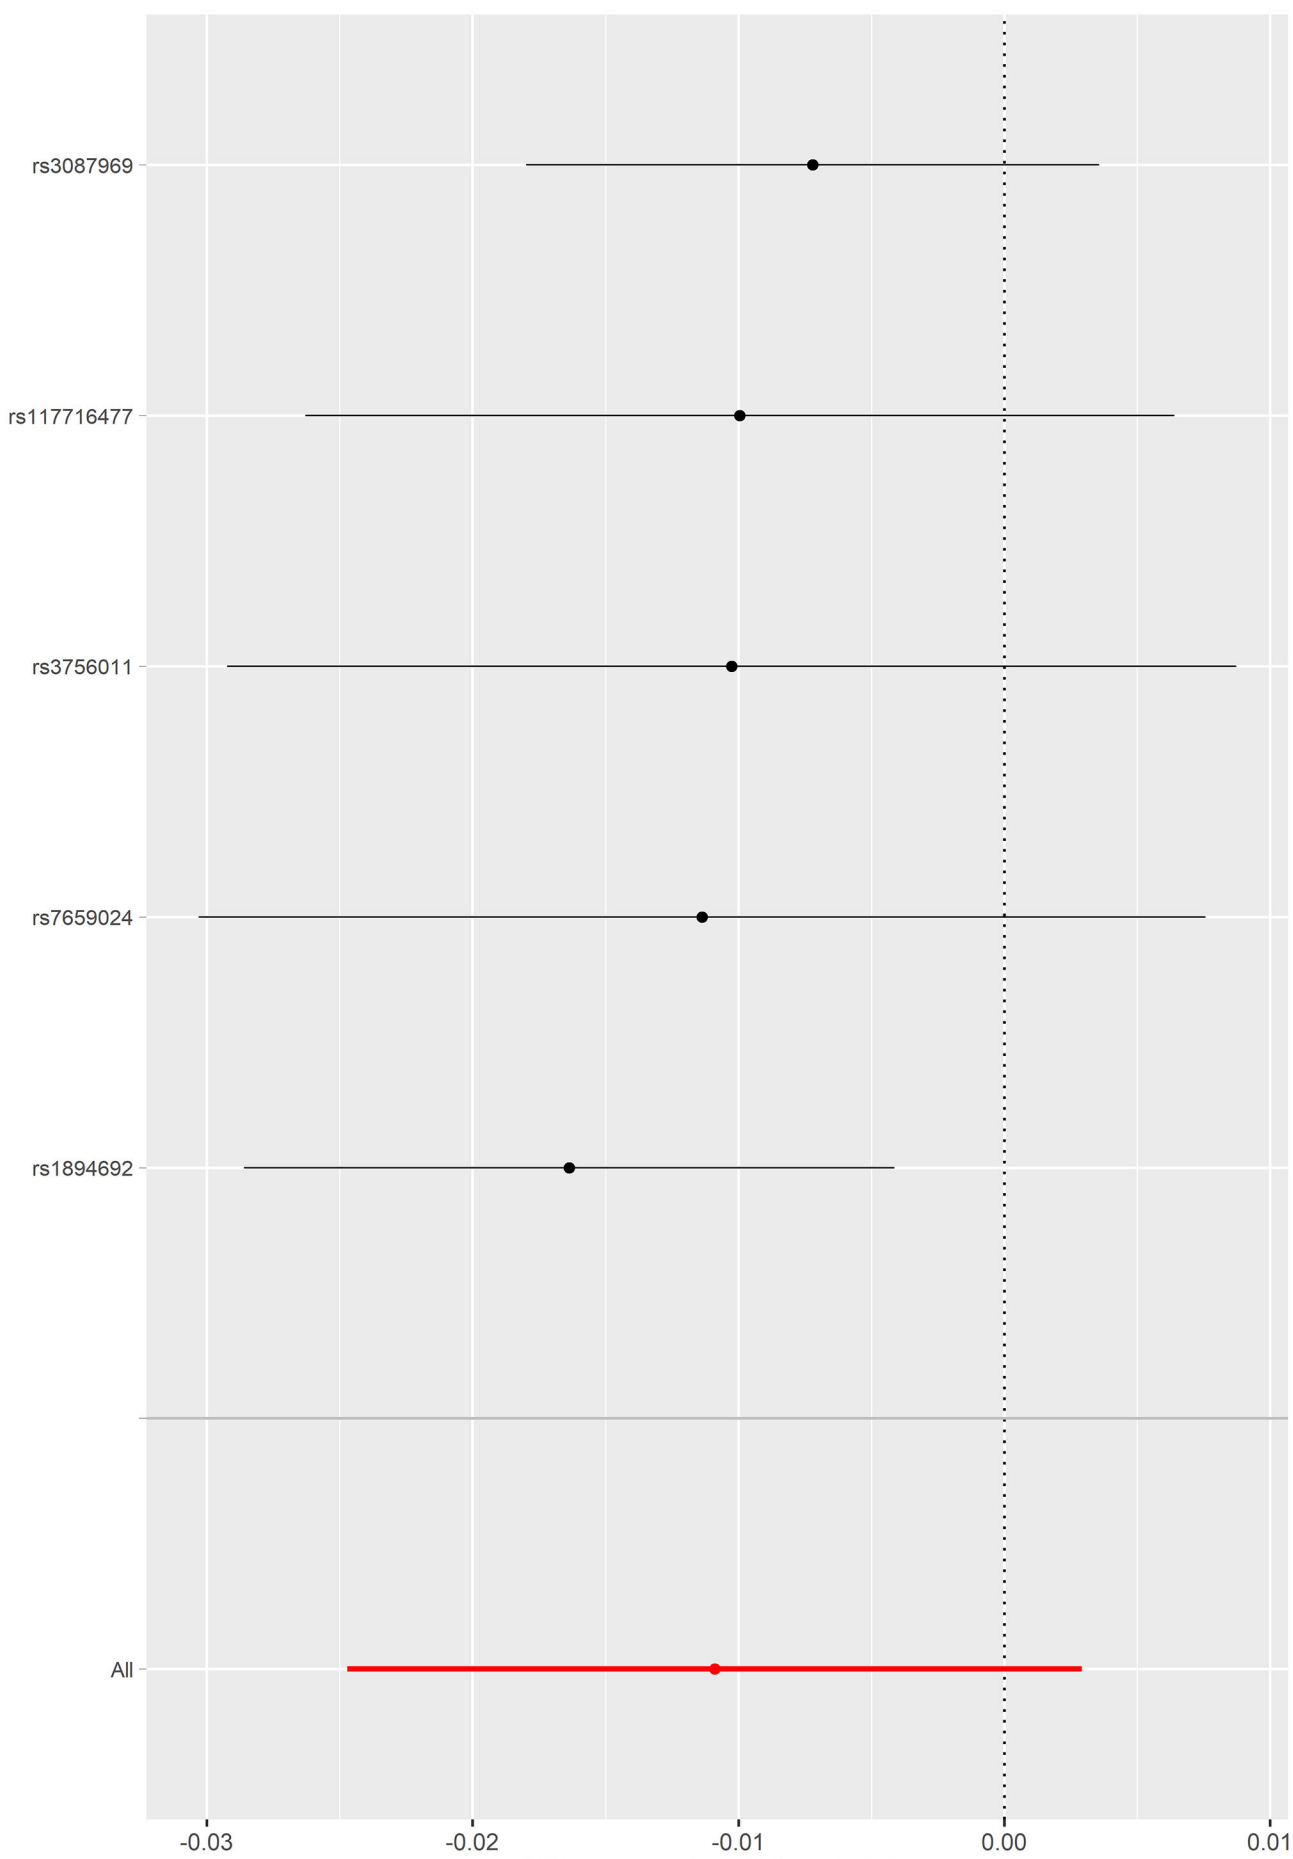

Figure S16. A. MR leave-one-out sensitivity analysis for PE on FEV1

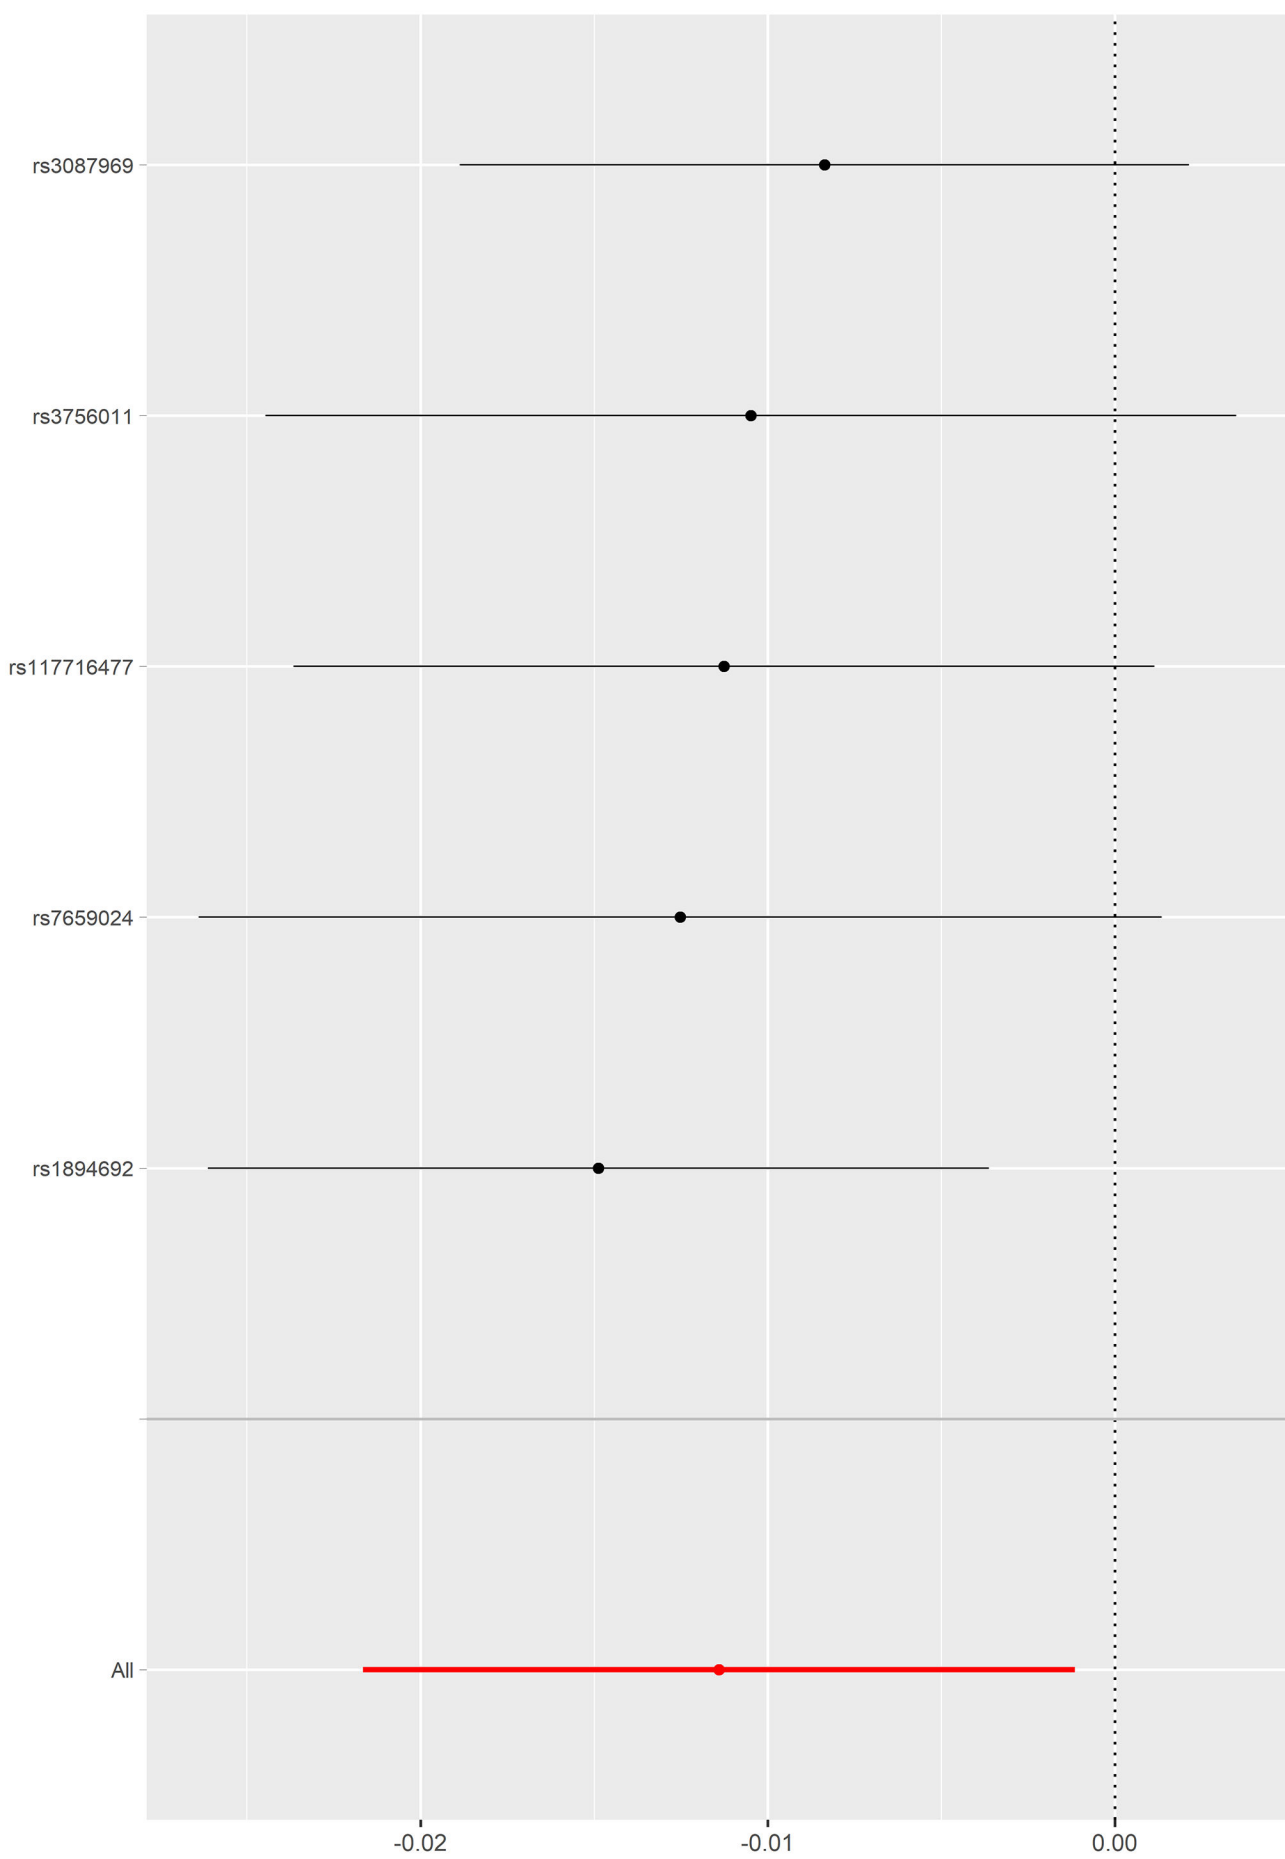

Figure S16. B. MR leave-one-out sensitivity analysis for PE on FVC

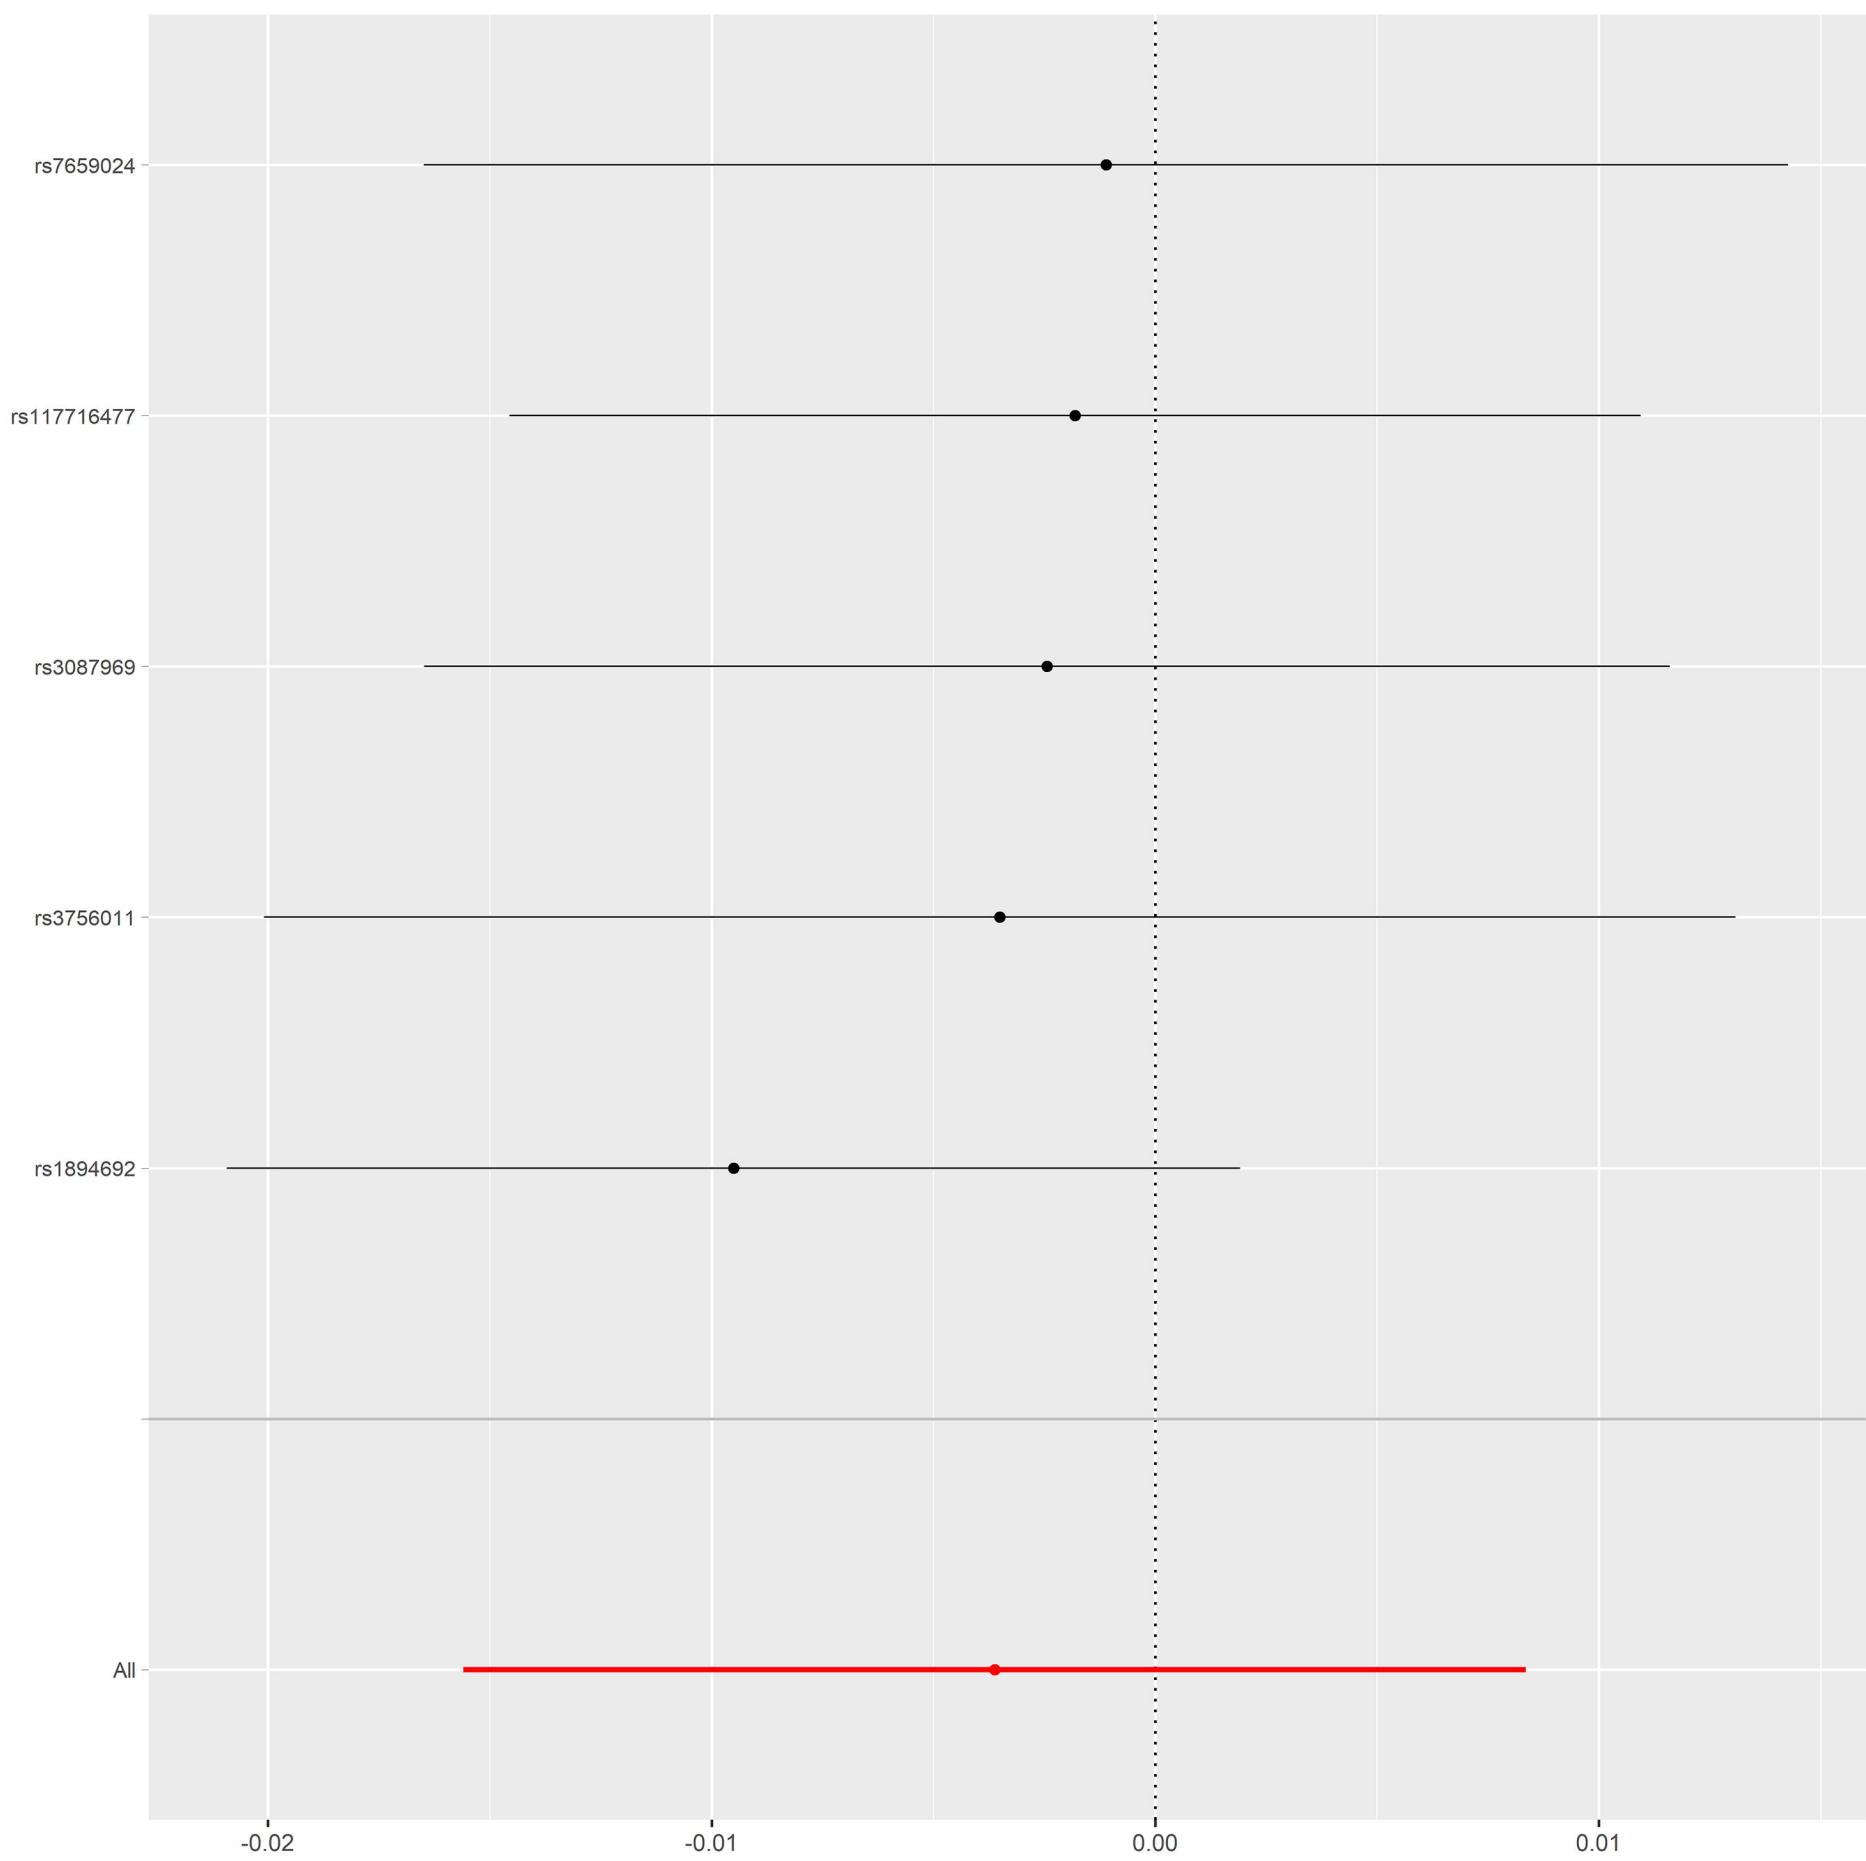

Figure S16. C. MR leave-one-out sensitivity analysis for PE on FEV1/FVC

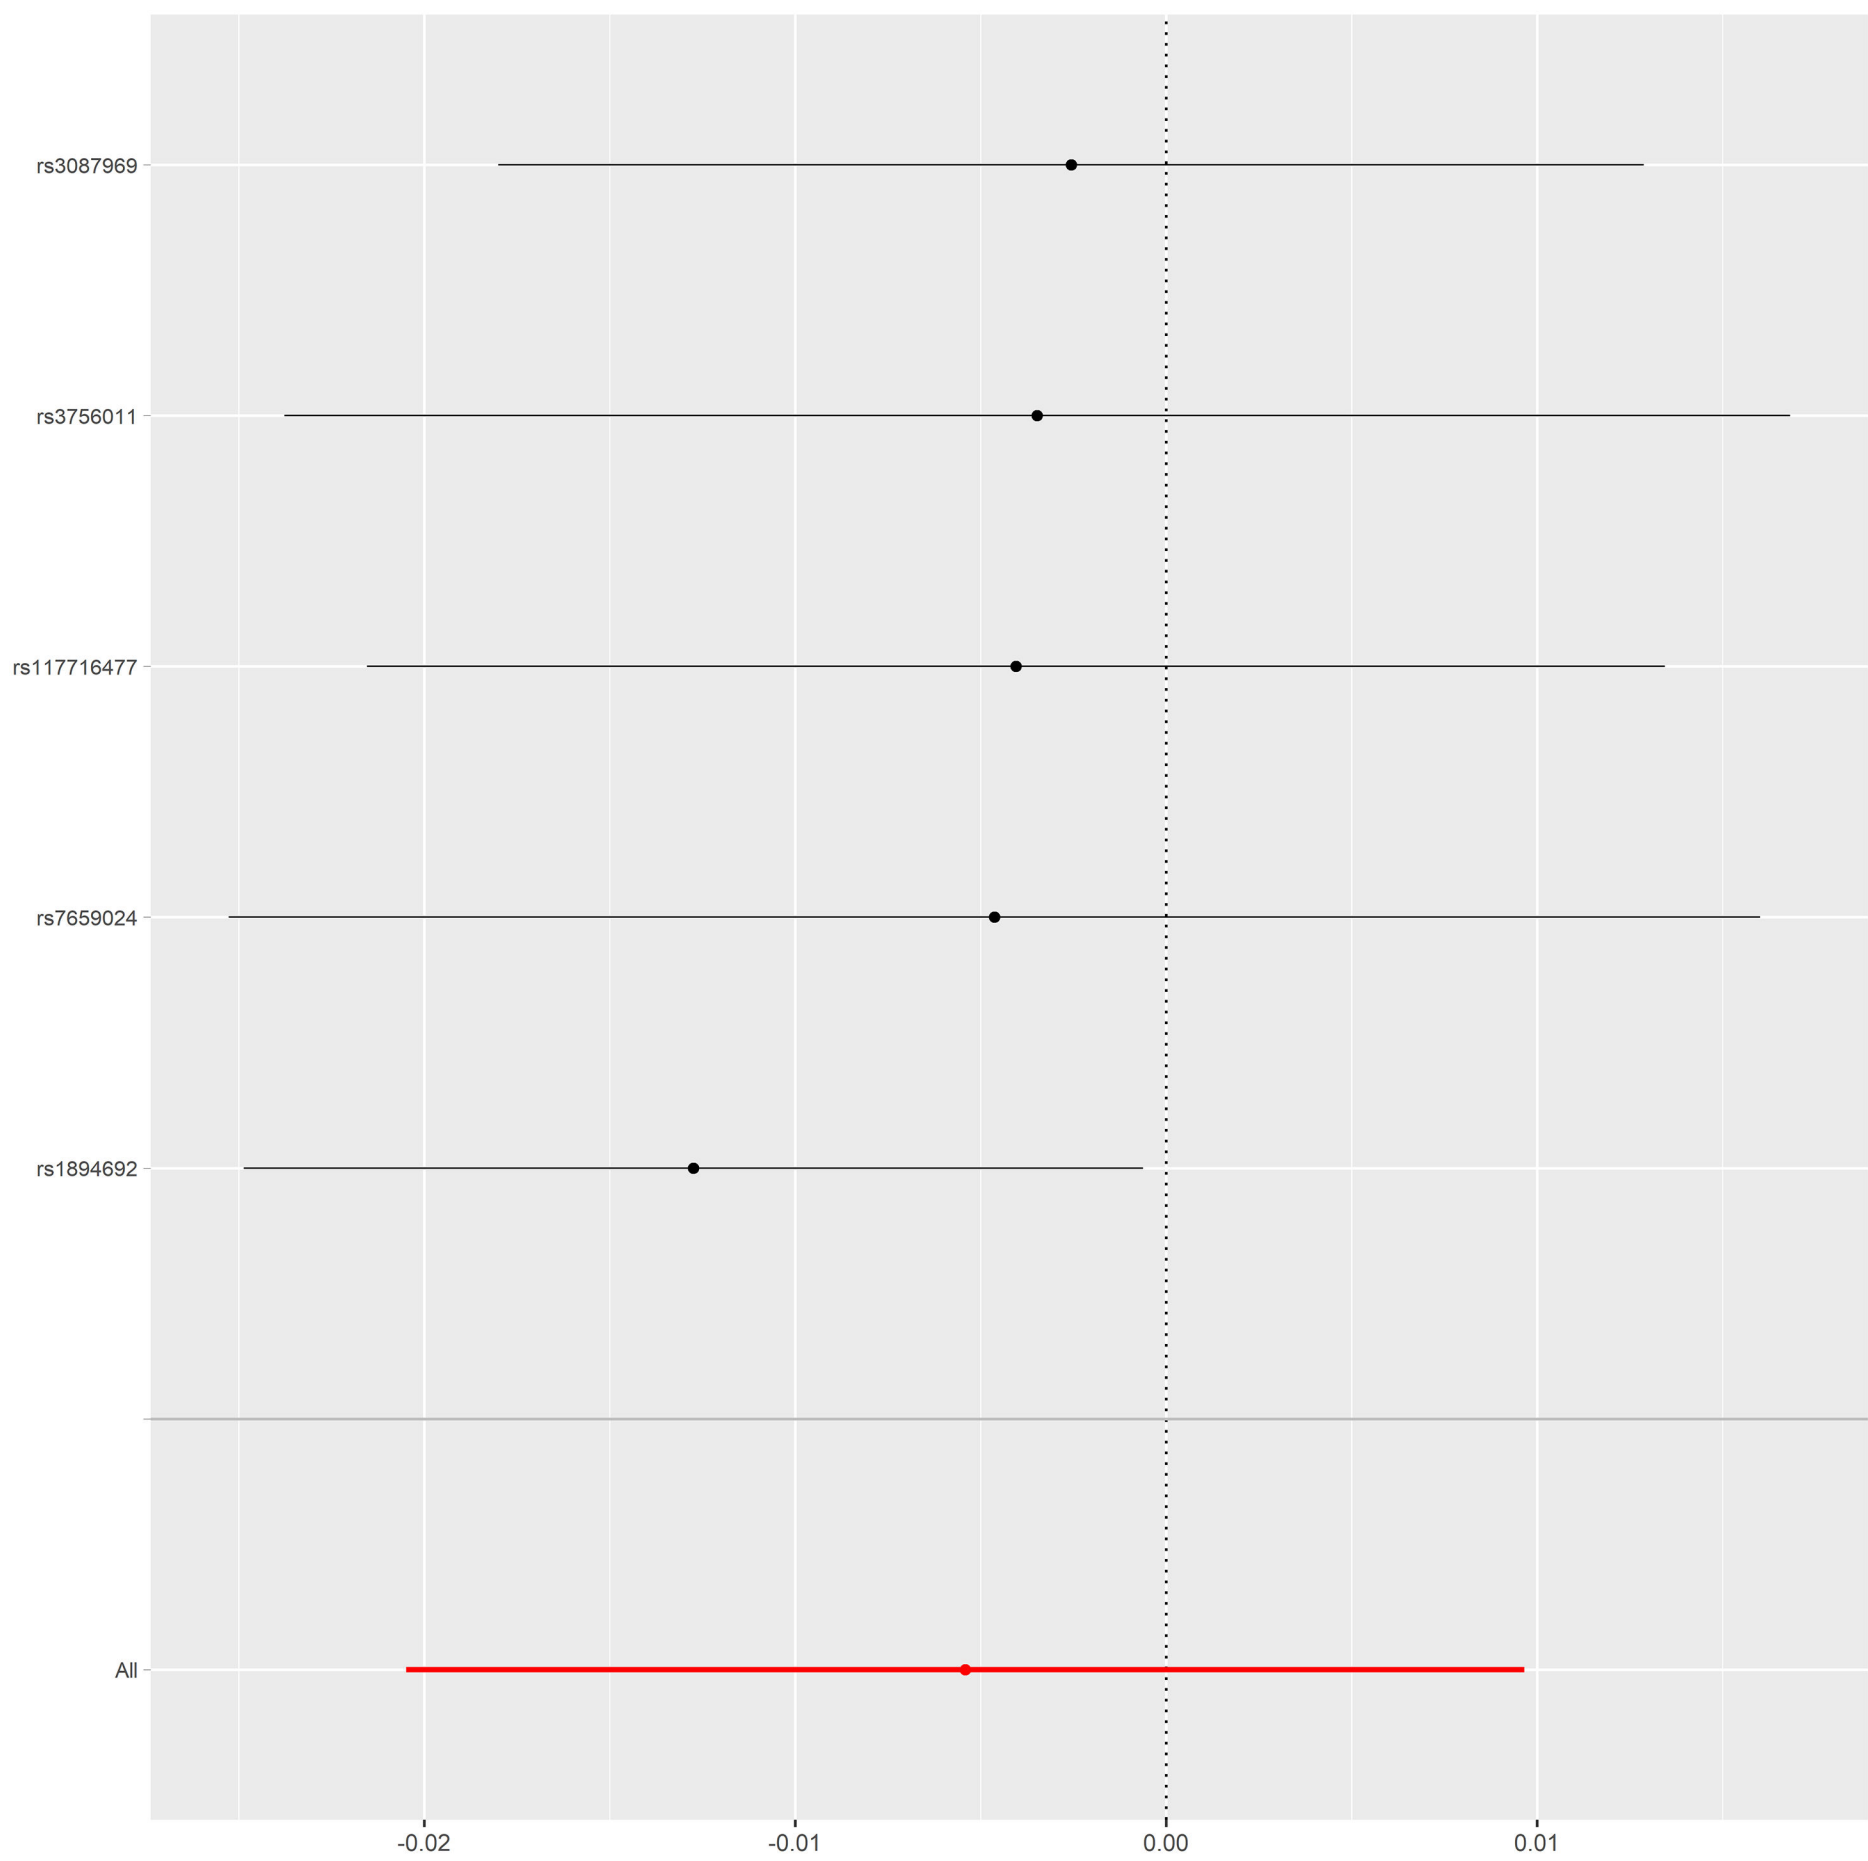

Figure S16. D. MR leave-one-out sensitivity analysis for PE on PEF
